# Supplementary material for: Association of COVID-19 vaccines ChAdOx1 and BNT162b2 with major venous, arterial, or thrombocytopenic events: A population-based cohort study of 46 million adults in England
Source: PubMed Central journal article supplement (PMC8863280; doi:10.1371/journal.pmed.1003926), 2022-02-22
Supplement: pmed.1003926.s003.pdf [file pmed.1003926.s003.pdf]

**S1 Table (a). Numbers of patients analysed and (in parentheses) risk per 100,000 people for the whole population during follow up of venous and arterial events and thrombocytopenia (TCP), overall and according to age.**

|                          |                                    | Overall    |               |                |             | Age, <70   |               |                |             | Age, ≥70  |              |                |            |
|--------------------------|------------------------------------|------------|---------------|----------------|-------------|------------|---------------|----------------|-------------|-----------|--------------|----------------|------------|
|                          |                                    | All        | Venous        | Arterial       | TCP         | All        | Venous        | Arterial       | TCP         | All       | Venous       | Arterial       | TCP        |
| N                        |                                    | 46,162,942 | 20,903 (45.3) | 87,251 (189)   | 1,926 (4.2) | 38,744,171 | 11,835 (30.5) | 38,283 (98.8)  | 1,167 (3.0) | 7,418,771 | 9,068 (122)  | 48,968 (660)   | 759 (10.2) |
| Sex                      | Male                               | 22,765,779 | 10,358 (45.5) | 51,851 (228)   | 986 (4.3)   | 19,425,454 | 6,406 (33.0)  | 26,549 (137)   | 555 (2.9)   | 3,340,325 | 3,952 (118)  | 25,302 (757)   | 431 (12.9) |
|                          | Female                             | 23,397,163 | 10,545 (45.1) | 35,400 (151)   | 940 (4.0)   | 19,318,717 | 5,429 (28.1)  | 11,734 (60.7)  | 612 (3.2)   | 4,078,446 | 5,116 (125)  | 23,666 (580)   | 328 (8.0)  |
| Age                      | 18 - 29                            | 8,821,973  | 781 (8.9)     | 400 (4.5)      | 143 (1.6)   | 8,821,973  | 781 (8.9)     | 400 (4.5)      | 143 (1.6)   |           |              |                |            |
|                          | 30 - 49                            | 16,131,025 | 3,544 (22.0)  | 6,424 (39.8)   | 338 (2.1)   | 16,131,025 | 3,544 (22.0)  | 6,424 (39.8)   | 338 (2.1)   |           |              |                |            |
|                          | 50 - 69                            | 13,791,173 | 7,510 (54.5)  | 31,459 (228)   | 686 (5.0)   | 13,791,173 | 7,510 (54.5)  | 31,459 (228)   | 686 (5.0)   |           |              |                |            |
|                          | 70 - 79                            | 4,674,973  | 4,820 (103)   | 22,249 (476)   | 418 (8.9)   |            |               |                |             | 4,674,973 | 4,820 (103)  | 22,249 (476)   | 418 (8.9)  |
|                          | 80+                                | 2,743,798  | 4,248 (155)   | 26,719 (974)   | 341 (12.4)  |            |               |                |             | 2,743,798 | 4,248 (155)  | 26,719 (974)   | 341 (12.4) |
| Ethnicity                | Asian or Asian British             | 3,718,442  | 599 (16.1)    | 5,325 (143)    | 152 (4.1)   | 3,467,223  | 475 (13.7)    | 3,378 (97.4)   | 125 (3.6)   | 251,219   | 124 (49.4)   | 1,947 (775)    | 27 (10.7)  |
|                          | Black or Black British             | 1,634,470  | 654 (40.0)    | 2,086 (128)    | 58 (3.5)    | 1,525,603  | 513 (33.6)    | 1,384 (90.7)   | 45 (2.9)    | 108,867   | 141 (130)    | 702 (645)      | 13 (11.9)  |
|                          | Mixed                              | 712,534    | 182 (25.5)    | 642 (90.1)     | 22 (3.1)    | 682,037    | 153 (22.4)    | 426 (62.5)     | 19 (2.8)    | 30,497    | 29 (95.1)    | 216 (708)      | <5 (9.8)   |
|                          | Other ethnic groups                | 1,497,133  | 217 (14.5)    | 1,072 (71.6)   | 39 (2.6)    | 1,427,187  | 162 (11.4)    | 678 (47.5)     | 33 (2.3)    | 69,946    | 55 (78.6)    | 394 (563)      | <5 (8.6)   |
|                          | White                              | 36,446,855 | 18,995 (52.1) | 77,118 (212)   | 1,643 (4.5) | 29,619,868 | 10,362 (35.0) | 31,821 (107)   | 939 (3.2)   | 6,826,987 | 8,633 (126)  | 45,297 (663)   | 704 (10.3) |
|                          | Unknown or missing                 | 2,153,508  | 256 (11.9)    | 1,008 (46.8)   | 12 (0.6)    | 2,022,253  | 170 (8.4)     | 596 (29.5)     | 6 (0.3)     | 131,255   | 86 (65.5)    | 412 (314)      | <10 (4.6)  |
| Deprivation <sup>1</sup> | 1 - 2                              | 9,118,746  | 4,565 (50.1)  | 18,830 (206)   | 365 (4.0)   | 8,069,275  | 3,064 (38.0)  | 10,493 (130)   | 272 (3.4)   | 1,049,471 | 1,501 (143)  | 8,337 (794)    | 93 (8.9)   |
|                          | 3 - 4                              | 9,567,633  | 4,105 (42.9)  | 17,436 (182)   | 370 (3.9)   | 8,273,028  | 2,454 (29.7)  | 8,370 (101)    | 234 (2.8)   | 1,294,605 | 1,651 (128)  | 9,066 (700)    | 136 (10.5) |
|                          | 5 - 6                              | 9,355,549  | 4,091 (43.7)  | 17,642 (189)   | 392 (4.2)   | 7,784,840  | 2,235 (28.7)  | 7,263 (93.3)   | 221 (2.8)   | 1,570,709 | 1,856 (118)  | 10,379 (661)   | 171 (10.9) |
|                          | 7 - 8                              | 9,076,313  | 4,146 (45.7)  | 16,939 (187)   | 381 (4.2)   | 7,362,375  | 2,128 (28.9)  | 6,334 (86.0)   | 221 (3.0)   | 1,713,938 | 2,018 (118)  | 10,605 (619)   | 160 (9.3)  |
|                          | 9 - 10                             | 8,772,902  | 3,926 (44.8)  | 16,024 (183)   | 406 (4.6)   | 7,000,538  | 1,908 (27.3)  | 5,602 (80.0)   | 210 (3.0)   | 1,772,364 | 2,018 (114)  | 10,422 (588)   | 196 (11.1) |
| Smoking status           | Current                            | 7,814,045  | 3,079 (39.4)  | 16,115 (206)   | 260 (3.3)   | 7,287,225  | 2,492 (34.2)  | 11,811 (162)   | 219 (3.0)   | 526,820   | 587 (111)    | 4,304 (817)    | 41 (7.8)   |
|                          | Former                             | 10,623,072 | 6,930 (65.2)  | 31,768 (299)   | 581 (5.5)   | 7,826,062  | 3,233 (41.3)  | 11,703 (150)   | 277 (3.5)   | 2,797,010 | 3,697 (132)  | 20,065 (717)   | 304 (10.9) |
|                          | Never                              | 25,722,494 | 10,667 (41.5) | 38,701 (150)   | 1,053 (4.1) | 21,674,974 | 5,929 (27.4)  | 14,346 (66.2)  | 643 (3.0)   | 4,047,520 | 4,738 (117)  | 24,355 (602)   | 410 (10.1) |
| Medical history          | Stroke                             | 727,218    | 1,020 (140)   | 21,489 (2,955) | 104 (14.3)  | 286,650    | 323 (113)     | 8,147 (2,842)  | 40 (14.0)   | 440,568   | 697 (158)    | 13,342 (3,028) | 64 (14.5)  |
|                          | Myocardial infarction              | 1,189,182  | 1,436 (121)   | 24,212 (2,036) | 158 (13.3)  | 485,506    | 436 (89.8)    | 10,486 (2,160) | 46 (9.5)    | 703,676   | 1,000 (142)  | 13,726 (1,951) | 112 (15.9) |
|                          | DVT or PE                          | 603,351    | 3,263 (541)   | 4,050 (671)    | 142 (23.5)  | 341,788    | 1,919 (561)   | 1,377 (403)    | 76 (22.2)   | 261,563   | 1,344 (514)  | 2,673 (1,022)  | 66 (25.2)  |
|                          | Thrombophilia                      | 44,593     | 146 (327)     | 202 (453)      | 23 (51.6)   | 38,136     | 126 (330)     | 144 (378)      | 21 (55.1)   | 6,457     | 20 (310)     | 58 (898)       | <5 (31.0)  |
|                          | Coronavirus infection <sup>2</sup> | 1,284,984  | 1,131 (88.0)  | 4,167 (324)    | 101 (7.9)   | 1,124,135  | 576 (51.2)    | 1,642 (146)    | 63 (5.6)    | 160,849   | 555 (345)    | 2,525 (1,570)  | 38 (23.6)  |
|                          | Diabetes                           | 4,069,412  | 3,654 (89.8)  | 25,595 (629)   | 423 (10.4)  | 2,460,649  | 1,509 (61.3)  | 9,949 (404)    | 205 (8.3)   | 1,608,763 | 2,145 (133)  | 15,646 (973)   | 218 (13.6) |
|                          | Depression                         | 9,516,020  | 6,272 (65.9)  | 24,146 (254)   | 500 (5.3)   | 8,040,590  | 4,077 (50.7)  | 12,859 (160)   | 348 (4.3)   | 1,475,430 | 2,195 (149)  | 11,287 (765)   | 152 (10.3) |
|                          | Obesity                            | 10,918,274 | 8,873 (81.2)  | 31,194 (286)   | 679 (6.2)   | 8,757,004  | 5,430 (62.0)  | 15,848 (181)   | 411 (4.7)   | 2,161,270 | 3,433 (159)  | 15,346 (710)   | 268 (12.4) |
|                          | Cancer                             | 6,609,691  | 5,674 (85.8)  | 17,827 (270)   | 786 (11.9)  | 4,854,822  | 2,583 (53.2)  | 4,462 (91.9)   | 412 (8.5)   | 1,754,869 | 3,091 (176)  | 13,365 (762)   | 374 (21.3) |
|                          | COPD                               | 1,582,366  | 2,497 (158)   | 12,323 (779)   | 182 (11.5)  | 714,880    | 877 (123)     | 3,839 (537)    | 76 (10.6)   | 867,486   | 1,620 (187)  | 8,484 (978)    | 106 (12.2) |
|                          | Liver disease                      | 230,243    | 284 (123)     | 1,069 (464)    | 97 (42.1)   | 173,423    | 208 (120)     | 547 (315)      | 75 (43.2)   | 56,820    | 76 (134)     | 522 (919)      | 22 (38.7)  |
|                          | CKD                                | 2,934,107  | 4,467 (152)   | 25,816 (880)   | 526 (17.9)  | 978,886    | 1,179 (120)   | 5,164 (528)    | 200 (20.4)  | 1,955,221 | 3,288 (168)  | 20,652 (1,056) | 326 (16.7) |
|                          | Major surgery <sup>3</sup>         | 3,995,870  | 5,407 (135)   | 24,164 (605)   | 763 (19.1)  | 2,773,174  | 2,735 (98.6)  | 9,898 (357)    | 440 (15.9)  | 1,222,696 | 2,672 (219)  | 14,266 (1,167) | 323 (26.4) |
|                          | Dementia                           | 524,293    | 1,127 (215)   | 6,073 (1,158)  | 45 (8.6)    | 48,821     | 81 (166)      | 415 (850)      | 10 (20.5)   | 475,472   | 1,046 (220)  | 5,658 (1,190)  | 35 (7.4)   |
| Medications              | Antiplatelet                       | 2,510,382  | 2,814 (112)   | 36,415 (1,451) | 218 (8.7)   | 1,000,010  | 747 (74.7)    | 15,556 (1,556) | 65 (6.5)    | 1,510,372 | 2,067 (137)  | 20,859 (1,381) | 153 (10.1) |
|                          | BP lowering                        | 8,589,860  | 7,969 (92.8)  | 55,462 (646)   | 777 (9.0)   | 4,286,561  | 2,779 (64.8)  | 20,579 (480)   | 305 (7.1)   | 4,303,299 | 5,190 (121)  | 34,883 (811)   | 472 (11.0) |
|                          | Lipid lowering                     | 6,808,408  | 5,796 (85.1)  | 47,859 (703)   | 564 (8.3)   | 3,212,600  | 1,878 (58.5)  | 19,543 (608)   | 194 (6.0)   | 3,595,808 | 3,918 (109)  | 28,316 (787)   | 370 (10.3) |
|                          | Anticoagulant                      | 1,338,585  | 2,278 (170)   | 12,758 (953)   | 205 (15.3)  | 381,588    | 1,144 (300)   | 2,773 (727)    | 57 (14.9)   | 956,997   | 1,134 (118)  | 9,985 (1043)   | 148 (15.5) |
|                          | Oral contraceptive                 | 622,529    | 138 (22.2)    | 42 (6.7)       | 8 (1.3)     | 622,529    | 138 (22.2)    | 42 (6.7)       | 8 (1.3)     |           |              |                |            |
|                          | HRT                                | 540,722    | 213 (39.4)    | 516 (95.4)     | 16 (3.0)    | 501,957    | 185 (36.9)    | 368 (73.3)     | 14 (2.8)    | 38,765    | 28 (72.2)    | 148 (382)      | <5 (5.2)   |
| Number of diagnoses      | 0                                  | 36,455,307 | 12,200 (33.5) | 38,617 (106)   | 980 (2.7)   | 31,819,272 | 7,612 (23.9)  | 18,316 (57.6)  | 643 (2.0)   | 4,636,035 | 4,588 (99.0) | 20,301 (438)   | 337 (7.3)  |
|                          | 1 - 5                              | 9,573,068  | 8,422 (88.0)  | 46,012 (481)   | 925 (9.7)   | 6,872,479  | 4,137 (60.2)  | 19,183 (279)   | 515 (7.5)   | 2,700,589 | 4,285 (159)  | 26,829 (993)   | 410 (15.2) |
|                          | 6+                                 | 134,567    | 281 (209)     | 2,622 (1948)   | 21 (15.6)   | 52,420     | 86 (164)      | 784 (1496)     | 9 (17.2)    | 82,147    | 195 (237)    | 1,838 (2,237)  | 12 (14.6)  |
| Number of medications    | 0                                  | 22,970,920 | 3,679 (16.0)  | 9,629 (41.9)   | 321 (1.4)   | 22,122,043 | 3,143 (14.2)  | 7,258 (32.8)   | 290 (1.3)   | 848,877   | 536 (63.1)   | 2,371 (279)    | 31 (3.7)   |
|                          | 1 - 5                              | 20,875,516 | 12,872 (61.7) | 56,255 (269)   | 1,210 (5.8) | 15,618,756 | 7,203 (46.1)  | 25,416 (163)   | 713 (4.6)   | 5,256,760 | 5,669 (108)  | 30,839 (587)   | 497 (9.5)  |
|                          | 6+                                 | 2,316,506  | 4,352 (188)   | 21,367 (922)   | 395 (17.1)  | 1,003,372  | 1,489 (148)   | 5,609 (559)    | 164 (16.3)  | 1,313,134 | 2,863 (218)  | 15,758 (1,200) | 231 (17.6) |

<sup>1</sup> Index of Multiple Deprivation deciles where 10 indicates least deprived and 1 indicates most deprived; <sup>2</sup> After 31/12/2019 and prior to 08/12/2020; <sup>3</sup> In the last year. BP: blood pressure, DCT: deep vein thrombosis; PE: pulmonary embolism; COPD: chronic obstructive respiratory disease; CKD: chronic kidney disease; BP: blood pressure; HRT: hormone replacement therapy; TCP: thrombocytopenia

**S1 Table (b). Numbers and incidence rates pre-, post-first ChAdOx1-S. Incidence rate per 100,000 person years. Disclosure control prevents presentation of n>5**

| Outcome                                                | Age | Pre vaccination or unvaccinated |                         | Post vaccination ≤28 days |                         | Post vaccination >28 days |                         |
|--------------------------------------------------------|-----|---------------------------------|-------------------------|---------------------------|-------------------------|---------------------------|-------------------------|
|                                                        |     | N (events)                      | Incidence rate (95% CI) | N (events)                | Incidence rate (95% CI) | N (events)                | Incidence rate (95% CI) |
| All venous                                             | All | 14,769                          | 139.8 (137.6–142.1)     | 2,006                     | 293.6 (281.0–306.7)     | 995                       | 359.3 (337.6–382.3)     |
|                                                        | <70 | 9,892                           | 103.5 (101.5–105.6)     | 902                       | 206.8 (193.8–220.8)     | 234                       | 221.7 (195.0–252.0)     |
|                                                        | ≥70 | 4,877                           | 483.8 (470.4–497.5)     | 1,104                     | 446.6 (421.0–473.7)     | 761                       | 444.0 (413.5–476.6)     |
| Intracranial venous thrombosis                         | All | 207                             | 1.96 (1.71–2.25)        | 27                        | 3.95 (2.71–5.76)        | 9                         | 3.25 (1.69–6.24)        |
|                                                        | <70 | 188                             | 1.97 (1.71–2.27)        | 22                        | 5.04 (3.32–7.66)        | <10                       | 4.74 (1.97–11.38)       |
|                                                        | ≥70 | 19                              | 1.88 (1.20–2.95)        | 5                         | 2.02 (0.84–4.86)        | <5                        | 2.33 (0.88–6.21)        |
| Portal vein thrombosis                                 | All | 121                             | 1.15 (0.96–1.37)        | 14                        | 2.05 (1.21–3.46)        | 9                         | 3.25 (1.69–6.24)        |
|                                                        | <70 | 98                              | 1.03 (0.84–1.25)        | 9                         | 2.06 (1.07–3.96)        | <5                        | 1.89 (0.47–7.57)        |
|                                                        | ≥70 | 23                              | 2.28 (1.52–3.43)        | 5                         | 2.02 (0.84–4.86)        | <10                       | 4.08 (1.95–8.56)        |
| Pulmonary embolism                                     | All | 8,473                           | 80.2 (78.5–81.9)        | 1,203                     | 176.0 (166.4–186.3)     | 587                       | 211.9 (195.4–229.7)     |
|                                                        | <70 | 5,399                           | 56.5 (55.0–58.0)        | 515                       | 118.1 (108.3–128.7)     | 134                       | 126.9 (107.2–150.4)     |
|                                                        | ≥70 | 3,074                           | 304.9 (294.3–315.9)     | 688                       | 278.2 (258.2–299.8)     | 453                       | 264.2 (240.9–289.7)     |
| Deep vein thrombosis                                   | All | 5,664                           | 53.6 (52.2–55.0)        | 739                       | 108.1 (100.6–116.2)     | 374                       | 135.0 (122.0–149.4)     |
|                                                        | <70 | 3,971                           | 41.6 (40.3–42.9)        | 345                       | 79.1 (71.2–87.9)        | 90                        | 85.2 (69.3–104.8)       |
|                                                        | ≥70 | 1,693                           | 167.9 (160.1–176.1)     | 394                       | 159.3 (144.3–175.8)     | 284                       | 165.6 (147.4–186.0)     |
| Other                                                  | All | 459                             | 4.35 (3.97–4.76)        | 51                        | 7.46 (5.67–9.82)        | 30                        | 10.8 (7.6–15.5)         |
|                                                        | <70 | 359                             | 3.76 (3.39–4.17)        | 34                        | 7.79 (5.57–10.91)       | 9                         | 8.52 (4.43–16.38)       |
|                                                        | ≥70 | 100                             | 9.92 (8.15–12.06)       | 17                        | 6.87 (4.27–11.05)       | 21                        | 12.2 (8.0–18.8)         |
| All arterial                                           | All | 57,602                          | 545.6 (541.1–550.0)     | 8,256                     | 1,210.6 (1184.8–1237.0) | 4,634                     | 1,677.8 (1630.2–1726.8) |
|                                                        | <70 | 31,396                          | 328.7 (325.1–332.4)     | 2,993                     | 687.3 (663.1–712.4)     | 755                       | 716.3 (667.0–769.2)     |
|                                                        | ≥70 | 26,206                          | 2,603.7 (2572.4–2635.5) | 5,263                     | 2,135.3 (2078.3–2193.7) | 3,879                     | 2,271.2 (2200.9–2343.8) |
| Myocardial infarction                                  | All | 28,134                          | 266.4 (263.3–269.5)     | 3,814                     | 558.5 (541.1–576.5)     | 2,050                     | 740.7 (709.4–773.5)     |
|                                                        | <70 | 17,341                          | 181.5 (178.8–184.2)     | 1,628                     | 373.5 (355.8–392.1)     | 363                       | 344.1 (310.4–381.3)     |
|                                                        | ≥70 | 10,793                          | 1,071.0 (1051.0–1091.4) | 2,186                     | 885.0 (848.6–922.9)     | 1,687                     | 985.1 (939.2–1033.3)    |
| Ischaemic stroke<br>(ischaemic, unknown, spinal)       | All | 28,639                          | 271.2 (268.1–274.3)     | 4,334                     | 634.8 (616.1–654.0)     | 2,539                     | 917.9 (882.9–954.3)     |
|                                                        | <70 | 13,505                          | 141.4 (139.0–143.8)     | 1,309                     | 300.3 (284.5–317.0)     | 377                       | 357.3 (323.0–395.3)     |
|                                                        | ≥70 | 15,134                          | 1,502.4 (1478.7–1526.6) | 3,025                     | 1,225.4 (1182.5–1269.9) | 2,162                     | 1,263.5 (1211.3–1317.9) |
| Other arterial                                         | All | 1,308                           | 12.4 (11.7–13.1)        | 189                       | 27.6 (24.0–31.9)        | 98                        | 35.4 (29.0–43.1)        |
|                                                        | <70 | 775                             | 8.11 (7.56–8.70)        | 82                        | 18.8 (15.1–23.3)        | 22                        | 20.8 (13.7–31.6)        |
|                                                        | ≥70 | 533                             | 52.9 (48.6–57.5)        | 107                       | 43.3 (35.8–52.3)        | 76                        | 44.3 (35.4–55.5)        |
| <b>Haematological</b>                                  |     |                                 |                         |                           |                         |                           |                         |
| Disseminated intravascular coagulation                 | All | 13                              | 0.12 (0.07–0.21)        | <5                        | 0.44 (0.14–1.36)        | <5                        | -                       |
|                                                        | <70 | 5                               | 0.05 (0.02–0.13)        | <5                        | 0.46 (0.11–1.83)        | <5                        | -                       |
|                                                        | ≥70 | 8                               | 0.79 (0.40–1.59)        | <5                        | 0.40 (0.06–2.87)        | <5                        | -                       |
| Thrombotic thrombocytopenic purpura                    | All | 70                              | 0.66 (0.52–0.84)        | <5                        | 0.59 (0.22–1.56)        | <5                        | 0.72 (0.18–2.89)        |
|                                                        | <70 | 64                              | 0.67 (0.52–0.86)        | <5                        | 0.69 (0.22–2.13)        | <5                        | 1.89 (0.47–7.57)        |
|                                                        | ≥70 | 6                               | 0.59 (0.27–1.32)        | <5                        | 0.40 (0.06–2.87)        | <5                        | -                       |
| Any thrombocytopenia                                   | All | 1,357                           | 12.8 (12.2–13.5)        | 200                       | 29.3 (25.5–33.6)        | 89                        | 32.1 (26.1–39.5)        |
|                                                        | <70 | 915                             | 9.58 (8.98–10.22)       | 124                       | 28.4 (23.8–33.9)        | 41                        | 38.8 (28.6–52.7)        |
|                                                        | ≥70 | 442                             | 43.8 (39.9–48.1)        | 76                        | 30.7 (24.5–38.5)        | 48                        | 28.0 (21.1–37.1)        |
| <b>Other</b>                                           |     |                                 |                         |                           |                         |                           |                         |
| Haemorrhagic stroke<br>(intracerebral or subarachnoid) | All | 3,747                           | 35.5 (34.4–36.6)        | 487                       | 71.2 (65.2–77.9)        | 289                       | 104.3 (92.9–117.0)      |
|                                                        | <70 | 2,028                           | 21.2 (20.3–22.2)        | 157                       | 36.0 (30.8–42.1)        | 45                        | 42.6 (31.8–57.1)        |
|                                                        | ≥70 | 1,719                           | 170.5 (162.6–178.7)     | 330                       | 133.4 (119.8–148.6)     | 244                       | 142.2 (125.5–161.3)     |
| Mesenteric thrombosis                                  | All | 1,170                           | 11.1 (10.5–11.7)        | 171                       | 25.0 (21.5–29.1)        | 109                       | 39.3 (32.6–47.5)        |
|                                                        | <70 | 531                             | 5.56 (5.10–6.05)        | 56                        | 12.8 (9.9–16.7)         | 20                        | 18.9 (12.2–29.4)        |
|                                                        | ≥70 | 639                             | 63.4 (58.6–68.5)        | 115                       | 46.5 (38.7–55.8)        | 89                        | 51.9 (42.1–63.9)        |
| Lower limb fracture                                    | All | 18,347                          | 173.7 (171.2–176.3)     | 2,657                     | 389.0 (374.5–404.0)     | 1,632                     | 589.7 (561.7–619.0)     |
|                                                        | <70 | 8,732                           | 91.4 (89.5–93.3)        | 539                       | 123.6 (113.6–134.5)     | 155                       | 146.8 (125.4–171.9)     |
|                                                        | ≥70 | 9,615                           | 954.4 (935.5–973.7)     | 2,118                     | 857.7 (821.9–895.0)     | 1,477                     | 862.7 (819.8–907.8)     |
| Death                                                  | All | 123,580                         | 1,169.9 (1163.4–1176.4) | 16,192                    | 2,368.5 (2332.3–2405.2) | 11,738                    | 4,235.1 (4159.2–4312.4) |
|                                                        | <70 | 29,802                          | 311.9 (308.4–315.5)     | 1,940                     | 444.7 (425.3–464.9)     | 897                       | 849.5 (795.7–906.9)     |
|                                                        | ≥70 | 93,778                          | 9,298.8 (9239.5–9358.5) | 14,252                    | 5,761.2 (5667.4–5856.6) | 10,841                    | 6,318.9 (6201.1–6439.0) |

**S1 Table (c). Numbers and incidence rates pre-, post-first BNT162b2. Incidence rate per 100,000 person years. Disclosure control prevents presentation of n>5**

| Outcome                                             | Age | Pre vaccination or unvaccinated |                         | Post vaccination ≤28 days |                         | Post vaccination >28 days |                         |
|-----------------------------------------------------|-----|---------------------------------|-------------------------|---------------------------|-------------------------|---------------------------|-------------------------|
|                                                     | Age | N (events)                      | Incidence rate (95% CI) | N (events)                | Incidence rate (95% CI) | N (events)                | Incidence rate (95% CI) |
| All venous                                          | All | 14,769                          | 139.8 (137.6–142.1)     | 1,546                     | 240.8 (229.1–253.1)     | 1,587                     | 277.1 (263.8–291.0)     |
|                                                     | <70 | 9,892                           | 103.5 (101.5–105.6)     | 548                       | 149.0 (137.0–162.0)     | 259                       | 106.3 (94.1–120.0)      |
|                                                     | ≥70 | 4,877                           | 483.8 (470.4–497.5)     | 998                       | 364.1 (342.2–387.5)     | 1,328                     | 403.6 (382.5–425.9)     |
| Intracranial venous thrombosis                      | All | 207                             | 1.96 (1.71–2.25)        | 13                        | 2.02 (1.18–3.49)        | 6                         | 1.05 (0.47–2.33)        |
|                                                     | <70 | 188                             | 1.97 (1.71–2.27)        | 5                         | 1.36 (0.57–3.26)        | <5                        | 1.23 (0.40–3.82)        |
|                                                     | ≥70 | 19                              | 1.88 (1.20–2.95)        | 8                         | 2.92 (1.46–5.83)        | <5                        | 0.91 (0.29–2.83)        |
| Portal vein thrombosis                              | All | 121                             | 1.15 (0.96–1.37)        | 5                         | 0.78 (0.32–1.87)        | 12                        | 2.09 (1.19–3.69)        |
|                                                     | <70 | 98                              | 1.03 (0.84–1.25)        | <5                        | 0.54 (0.14–2.17)        | 6                         | 2.46 (1.11–5.48)        |
|                                                     | ≥70 | 23                              | 2.28 (1.52–3.43)        | <5                        | 1.09 (0.35–3.39)        | 6                         | 1.82 (0.82–4.06)        |
| Pulmonary embolism                                  | All | 8,473                           | 80.2 (78.5–81.9)        | 928                       | 144.5 (135.5–154.1)     | 955                       | 166.7 (156.5–177.6)     |
|                                                     | <70 | 5,399                           | 56.5 (55.0–58.0)        | 306                       | 83.2 (74.3–93.0)        | 141                       | 57.8 (49.0–68.2)        |
|                                                     | ≥70 | 3,074                           | 304.9 (294.3–315.9)     | 622                       | 226.9 (209.8–245.5)     | 814                       | 247.3 (230.9–264.9)     |
| Deep vein thrombosis                                | All | 5,664                           | 53.6 (52.2–55.0)        | 555                       | 86.4 (79.5–93.9)        | 590                       | 103.0 (95.0–111.6)      |
|                                                     | <70 | 3,971                           | 41.6 (40.3–42.9)        | 213                       | 57.9 (50.6–66.2)        | 103                       | 42.3 (34.8–51.3)        |
|                                                     | ≥70 | 1,693                           | 167.9 (160.1–176.1)     | 342                       | 124.8 (112.2–138.7)     | 487                       | 147.9 (135.4–161.7)     |
| Other                                               | All | 459                             | 4.35 (3.97–4.76)        | 55                        | 8.56 (6.58–11.15)       | 39                        | 6.81 (4.97–9.31)        |
|                                                     | <70 | 359                             | 3.76 (3.39–4.17)        | 28                        | 7.61 (5.25–11.02)       | 13                        | 5.33 (3.10–9.18)        |
|                                                     | ≥70 | 100                             | 9.92 (8.15–12.06)       | 27                        | 9.85 (6.75–14.36)       | 26                        | 7.90 (5.38–11.60)       |
| All arterial                                        | All | 57,602                          | 545.6 (541.1–550.0)     | 7,960                     | 1,241.8 (1214.9–1269.4) | 8,799                     | 1,539.7 (1507.8–1572.2) |
|                                                     | <70 | 31,396                          | 328.7 (325.1–332.4)     | 2,263                     | 615.8 (591.0–641.7)     | 876                       | 359.6 (336.6–384.2)     |
|                                                     | ≥70 | 26,206                          | 2,603.7 (2572.4–2635.5) | 5,697                     | 2,082.9 (2029.5–2137.7) | 7,923                     | 2,416.4 (2363.8–2470.2) |
| Myocardial infarction                               | All | 28,134                          | 266.4 (263.3–269.5)     | 3,722                     | 580.1 (561.8–599.0)     | 4,023                     | 702.9 (681.5–724.9)     |
|                                                     | <70 | 17,341                          | 181.5 (178.8–184.2)     | 1,285                     | 349.5 (330.9–369.1)     | 489                       | 200.7 (183.6–219.3)     |
|                                                     | ≥70 | 10,793                          | 1,071.0 (1051.0–1091.4) | 2,437                     | 889.8 (855.1–925.8)     | 3,534                     | 1,075.2 (1040.3–1111.2) |
| Ischaemic stroke (ischaemic, unknown, spinal)       | All | 28,639                          | 271.2 (268.1–274.3)     | 4,143                     | 645.7 (626.4–665.7)     | 4,702                     | 821.8 (798.6–845.6)     |
|                                                     | <70 | 13,505                          | 141.4 (139.0–143.8)     | 949                       | 258.0 (242.1–275.0)     | 369                       | 151.4 (136.7–167.7)     |
|                                                     | ≥70 | 15,134                          | 1,502.4 (1478.7–1526.6) | 3,194                     | 1,166.5 (1126.7–1207.7) | 4,333                     | 1,319.1 (1280.4–1359.0) |
| Other arterial                                      | All | 1,308                           | 12.4 (11.7–13.1)        | 156                       | 24.3 (20.8–28.4)        | 167                       | 29.1 (25.0–33.9)        |
|                                                     | <70 | 775                             | 8.11 (7.56–8.70)        | 46                        | 12.5 (9.4–16.7)         | 26                        | 10.7 (7.3–15.7)         |
|                                                     | ≥70 | 533                             | 52.9 (48.6–57.5)        | 110                       | 40.1 (33.3–48.4)        | 141                       | 42.8 (36.3–50.5)        |
| <b>Haematological</b>                               |     |                                 |                         |                           |                         |                           |                         |
| Disseminated intravascular coagulation              | All | 13                              | 0.12 (0.07–0.21)        | <5                        | 0.31 (0.08–1.25)        | <5                        | 0.35 (0.09–1.40)        |
|                                                     | <70 | 5                               | 0.05 (0.02–0.13)        | <5                        | 0.27 (0.04–1.93)        | <5                        | -                       |
|                                                     | ≥70 | 8                               | 0.79 (0.40–1.59)        | <5                        | 0.36 (0.05–2.59)        | <5                        | 0.61 (0.15–2.43)        |
| Thrombotic thrombocytopenic purpura                 | All | 70                              | 0.66 (0.52–0.84)        | <5                        | 0.62 (0.23–1.66)        | <5                        | 0.35 (0.09–1.40)        |
|                                                     | <70 | 64                              | 0.67 (0.52–0.86)        | <5                        | 0.82 (0.26–2.53)        | <5                        | 0.82 (0.21–3.28)        |
|                                                     | ≥70 | 6                               | 0.59 (0.27–1.32)        | <5                        | 0.36 (0.05–2.59)        | <5                        | -                       |
| Any thrombocytopenia                                | All | 1,357                           | 12.8 (12.2–13.5)        | 136                       | 21.2 (17.9–25.1)        | 144                       | 25.1 (21.3–29.6)        |
|                                                     | <70 | 915                             | 9.58 (8.98–10.22)       | 55                        | 14.9 (11.5–19.5)        | 32                        | 13.1 (9.3–18.6)         |
|                                                     | ≥70 | 442                             | 43.8 (39.9–48.1)        | 81                        | 29.5 (23.8–36.7)        | 112                       | 34.0 (28.3–40.9)        |
| <b>Other</b>                                        |     |                                 |                         |                           |                         |                           |                         |
| Haemorrhagic stroke (intracerebral or subarachnoid) | All | 3,747                           | 35.5 (34.4–36.6)        | 440                       | 68.5 (62.4–75.2)        | 579                       | 101.0 (93.1–109.6)      |
|                                                     | <70 | 2,028                           | 21.2 (20.3–22.2)        | 93                        | 25.3 (20.6–31.0)        | 55                        | 22.6 (17.3–29.4)        |
|                                                     | ≥70 | 1,719                           | 170.5 (162.6–178.7)     | 347                       | 126.6 (113.9–140.6)     | 524                       | 159.2 (146.1–173.4)     |
| Mesenteric thrombosis                               | All | 1,170                           | 11.1 (10.5–11.7)        | 161                       | 25.1 (21.5–29.3)        | 217                       | 37.9 (33.2–43.3)        |
|                                                     | <70 | 531                             | 5.56 (5.10–6.05)        | 28                        | 7.61 (5.25–11.02)       | 18                        | 7.38 (4.65–11.72)       |
|                                                     | ≥70 | 639                             | 63.4 (58.6–68.5)        | 133                       | 48.5 (40.9–57.5)        | 199                       | 60.4 (52.6–69.5)        |
| Lower limb fracture                                 | All | 18,347                          | 173.7 (171.2–176.3)     | 2,573                     | 400.8 (385.6–416.6)     | 3,176                     | 554.7 (535.8–574.4)     |
|                                                     | <70 | 8732                            | 91.4 (89.5–93.3)        | 443                       | 120.4 (109.7–132.1)     | 228                       | 93.5 (82.2–106.5)       |
|                                                     | ≥70 | 9615                            | 954.4 (935.5–973.7)     | 2,130                     | 777.3 (745.0–811.0)     | 2,948                     | 896.6 (864.9–929.6)     |
| Death                                               | All | 123,580                         | 1,169.9 (1163.4–1176.4) | 9,117                     | 1,419.6 (1390.8–1449.0) | 13,935                    | 2,431.7 (2391.7–2472.4) |
|                                                     | <70 | 29,802                          | 311.9 (308.4–315.5)     | 775                       | 210.6 (196.3–225.9)     | 531                       | 217.8 (200.0–237.1)     |
|                                                     | ≥70 | 93,778                          | 9,298.8 (9239.5–9358.5) | 8,342                     | 3,042.5 (2977.9–3108.5) | 13,404                    | 4,071.0 (4002.7–4140.5) |

S1 Table (d): Hazard ratios (95% CIs) for thrombotic and other outcomes 1-28 and >28 days post-vaccination with ChAdOx1-S vaccine, compared with pre-vaccination rates. All analyses were stratified on geographical region.

| Outcome                        | Age | Sex     | 1-28 days post-vaccination |                                   |                             | >28 days post vaccination |                                   |                             |
|--------------------------------|-----|---------|----------------------------|-----------------------------------|-----------------------------|---------------------------|-----------------------------------|-----------------------------|
|                                |     |         | Unadjusted <sup>1</sup>    | Age and sex adjusted <sup>2</sup> | Fully adjusted <sup>3</sup> | Unadjusted <sup>1</sup>   | Age and sex adjusted <sup>2</sup> | Fully adjusted <sup>3</sup> |
| All venous events              | <70 | Overall | 2.33 (2.16–2.51)           | 1.32 (1.22–1.43)                  | 0.97 (0.90–1.05)            | 2.74 (2.39–3.14)          | 1.60 (1.38–1.84)                  | 0.94 (0.81–1.08)            |
|                                |     | Men     | 2.68 (2.41–2.97)           | 1.33 (1.19–1.49)                  | 1.04 (0.93–1.16)            | 3.13 (2.54–3.84)          | 1.52 (1.23–1.89)                  | 0.97 (0.78–1.20)            |
|                                |     | Women   | 2.08 (1.87–2.31)           | 1.31 (1.17–1.47)                  | 0.96 (0.85–1.07)            | 2.56 (2.13–3.07)          | 1.67 (1.38–2.02)                  | 1.02 (0.84–1.23)            |
|                                | ≥70 | Overall | 0.65 (0.59–0.72)           | 0.64 (0.59–0.70)                  | 0.58 (0.53–0.63)            | 0.67 (0.59–0.76)          | 0.58 (0.52–0.65)                  | 0.49 (0.44–0.55)            |
|                                |     | Men     | 0.65 (0.56–0.76)           | 0.65 (0.56–0.74)                  | 0.59 (0.51–0.68)            | 0.70 (0.58–0.84)          | 0.63 (0.53–0.75)                  | 0.55 (0.46–0.65)            |
|                                |     | Women   | 0.65 (0.58–0.74)           | 0.64 (0.56–0.71)                  | 0.57 (0.50–0.64)            | 0.64 (0.54–0.76)          | 0.54 (0.47–0.64)                  | 0.45 (0.39–0.53)            |
| Intracranial venous thrombosis | <70 | Overall | 2.81 (1.70–4.64)           | 2.99 (1.75–5.09)                  | 2.27 (1.33–3.88)            | 2.37 (0.91–6.12)          | 2.47 (0.95–6.42)                  | 1.72 (0.66–4.49)            |
|                                |     | Men     | 2.72 (1.15–6.39)           | 2.58 (0.99–6.74)                  | 2.06 (0.79–5.37)            | 3.43 (0.74–15.87)         | 3.37 (0.71–15.90)                 | 2.40 (0.53–10.86)           |
|                                |     | Women   | 2.69 (1.45–5.00)           | 3.27 (1.74–6.17)                  | 2.24 (1.17–4.31)            | 1.75 (0.52–5.93)          | 2.14 (0.63–7.22)                  | 1.47 (0.43–5.04)            |
|                                | ≥70 | Overall | 0.62 (0.17–2.23)           | 0.65 (0.19–2.21)                  | 0.67 (0.20–2.18)            | 1.35 (0.13–13.46)         | 1.13 (0.14–9.20)                  | 1.11 (0.14–9.02)            |
|                                |     | Men     | 10.8 (3.3–35.8)            | 8.99 (2.75–29.42)                 | 10.1 (2.7–38.5)             | -                         | -                                 | -                           |
|                                |     | Women   | 0.27 (0.05–1.42)           | 0.29 (0.06–1.43)                  | 0.28 (0.06–1.34)            | 0.87 (0.10–7.32)          | 0.82 (0.11–6.24)                  | 0.76 (0.10–5.70)            |
| Portal vein thrombosis         | <70 | Overall | 2.49 (1.20–5.14)           | 1.56 (0.72–3.40)                  | 1.00 (0.24–4.15)            | 2.76 (0.73–10.51)         | 1.99 (0.53–7.52)                  | 1.00 (0.06–18.18)           |
|                                |     | Men     | 3.38 (1.40–8.17)           | 1.95 (0.76–5.02)                  | 1.22 (0.48–3.08)            | 3.55 (0.52–24.13)         | 2.16 (0.32–14.52)                 | 0.98 (0.14–6.75)            |
|                                |     | Women   | 1.74 (0.48–6.26)           | 1.06 (0.28–4.07)                  | 0.72 (0.18–2.86)            | 2.39 (0.37–15.53)         | 1.57 (0.24–10.12)                 | 0.86 (0.12–6.28)            |
|                                | ≥70 | Overall | 0.66 (0.11–4.06)           | 0.67 (0.10–4.24)                  | 0.61 (0.10–3.71)            | 2.72 (0.49–15.02)         | 3.00 (0.48–18.99)                 | 2.61 (0.41–16.52)           |
|                                |     | Men     | 0.43 (0.09–2.09)           | 0.42 (0.08–2.15)                  | 0.37 (0.07–1.90)            | 8.60 (2.33–31.70)         | 7.99 (1.93–33.03)                 | 7.99 (2.03–31.38)           |
|                                |     | Women   | 0.92 (0.06–13.23)          | 0.92 (0.06–13.99)                 | 0.82 (0.06–11.05)           | 0.87 (0.12–6.02)          | 0.95 (0.12–7.39)                  | 0.86 (0.11–6.92)            |
| Pulmonary embolism             | <70 | Overall | 2.54 (2.30–2.80)           | 1.28 (1.15–1.43)                  | 0.95 (0.85–1.05)            | 3.12 (2.61–3.73)          | 1.63 (1.34–1.96)                  | 0.95 (0.79–1.15)            |
|                                |     | Men     | 2.83 (2.46–3.24)           | 1.27 (1.09–1.48)                  | 1.01 (0.87–1.17)            | 3.32 (2.52–4.38)          | 1.43 (1.07–1.91)                  | 0.92 (0.69–1.23)            |
|                                |     | Women   | 2.35 (2.04–2.70)           | 1.30 (1.12–1.52)                  | 0.95 (0.82–1.10)            | 3.09 (2.44–3.92)          | 1.81 (1.41–2.32)                  | 1.09 (0.85–1.41)            |
|                                | ≥70 | Overall | 0.62 (0.55–0.70)           | 0.60 (0.54–0.68)                  | 0.54 (0.48–0.61)            | 0.61 (0.52–0.72)          | 0.54 (0.46–0.62)                  | 0.45 (0.39–0.53)            |
|                                |     | Men     | 0.63 (0.52–0.75)           | 0.62 (0.52–0.74)                  | 0.57 (0.47–0.67)            | 0.63 (0.50–0.79)          | 0.57 (0.46–0.70)                  | 0.49 (0.40–0.62)            |
|                                |     | Women   | 0.61 (0.52–0.72)           | 0.59 (0.51–0.69)                  | 0.53 (0.45–0.61)            | 0.60 (0.48–0.75)          | 0.51 (0.42–0.63)                  | 0.43 (0.35–0.53)            |
| Deep vein thrombosis           | <70 | Overall | 2.08 (1.85–2.34)           | 1.34 (1.18–1.52)                  | 0.99 (0.87–1.12)            | 2.37 (1.90–2.96)          | 1.58 (1.25–1.99)                  | 0.97 (0.77–1.22)            |
|                                |     | Men     | 2.61 (2.22–3.07)           | 1.48 (1.25–1.76)                  | 1.15 (0.97–1.36)            | 2.85 (2.04–3.98)          | 1.62 (1.14–2.29)                  | 1.06 (0.75–1.50)            |
|                                |     | Women   | 1.67 (1.40–2.00)           | 1.21 (1.00–1.46)                  | 0.90 (0.75–1.09)            | 2.12 (1.57–2.86)          | 1.57 (1.15–2.13)                  | 1.02 (0.75–1.40)            |
|                                | ≥70 | Overall | 0.73 (0.62–0.86)           | 0.71 (0.61–0.83)                  | 0.63 (0.54–0.74)            | 0.71 (0.57–0.88)          | 0.62 (0.51–0.75)                  | 0.51 (0.42–0.62)            |
|                                |     | Men     | 0.72 (0.56–0.94)           | 0.71 (0.55–0.91)                  | 0.63 (0.49–0.81)            | 0.77 (0.56–1.06)          | 0.70 (0.51–0.95)                  | 0.58 (0.42–0.79)            |
|                                |     | Women   | 0.73 (0.59–0.90)           | 0.72 (0.59–0.87)                  | 0.64 (0.53–0.77)            | 0.67 (0.51–0.88)          | 0.57 (0.45–0.73)                  | 0.47 (0.37–0.60)            |
| Other                          | <70 | Overall | 2.48 (1.70–3.62)           | 1.60 (1.06–2.40)                  | 1.02 (0.69–1.52)            | 3.04 (1.54–6.00)          | 2.04 (1.01–4.09)                  | 0.94 (0.47–1.91)            |
|                                |     | Men     | 2.61 (1.51–4.53)           | 1.45 (0.79–2.64)                  | 1.02 (0.57–1.83)            | 3.17 (1.13–8.90)          | 1.74 (0.60–5.05)                  | 0.89 (0.31–2.58)            |
|                                |     | Women   | 2.38 (1.42–4.00)           | 1.74 (1.01–2.98)                  | 1.12 (0.65–1.91)            | 3.15 (1.29–7.73)          | 2.40 (0.97–5.96)                  | 1.26 (0.50–3.17)            |
|                                | ≥70 | Overall | 0.46 (0.21–1.01)           | 0.46 (0.21–0.99)                  | 0.43 (0.20–0.92)            | 1.13 (0.50–2.54)          | 1.03 (0.48–2.21)                  | 0.93 (0.42–2.03)            |
|                                |     | Men     | 0.38 (0.11–1.30)           | 0.39 (0.12–1.31)                  | 0.33 (0.10–1.08)            | 1.10 (0.36–3.39)          | 1.02 (0.34–3.04)                  | 0.79 (0.26–2.36)            |
|                                |     | Women   | 0.52 (0.19–1.44)           | 0.51 (0.20–1.36)                  | 0.50 (0.19–1.32)            | 1.16 (0.37–3.63)          | 1.03 (0.36–2.98)                  | 0.98 (0.33–2.94)            |
| All arterial events            | <70 | Overall | 3.02 (2.90–3.14)           | 1.25 (1.20–1.31)                  | 0.90 (0.86–0.95)            | 3.55 (3.29–3.83)          | 1.57 (1.45–1.70)                  | 0.91 (0.84–1.00)            |
|                                |     | Men     | 3.42 (3.26–3.60)           | 1.26 (1.20–1.34)                  | 0.91 (0.86–0.96)            | 4.70 (4.27–5.17)          | 1.66 (1.50–1.84)                  | 0.96 (0.86–1.07)            |
|                                |     | Women   | 2.96 (2.76–3.18)           | 1.24 (1.14–1.34)                  | 0.93 (0.86–1.00)            | 3.30 (2.90–3.75)          | 1.43 (1.25–1.64)                  | 0.88 (0.77–1.02)            |
|                                | ≥70 | Overall | 0.89 (0.85–0.93)           | 0.84 (0.80–0.87)                  | 0.76 (0.73–0.79)            | 1.03 (0.97–1.10)          | 0.83 (0.78–0.87)                  | 0.72 (0.68–0.77)            |
|                                |     | Men     | 0.90 (0.85–0.96)           | 0.87 (0.82–0.92)                  | 0.78 (0.74–0.83)            | 1.06 (0.97–1.16)          | 0.89 (0.82–0.96)                  | 0.78 (0.71–0.85)            |
|                                |     | Women   | 0.88 (0.82–0.94)           | 0.80 (0.76–0.85)                  | 0.73 (0.69–0.78)            | 1.02 (0.93–1.12)          | 0.77 (0.71–0.83)                  | 0.68 (0.62–0.74)            |
| Myocardial infarction          | <70 | Overall | 2.85 (2.70–3.01)           | 1.24 (1.17–1.32)                  | 0.88 (0.83–0.94)            | 2.93 (2.63–3.26)          | 1.40 (1.24–1.56)                  | 0.83 (0.73–0.93)            |
|                                |     | Men     | 3.23 (3.02–3.44)           | 1.25 (1.17–1.35)                  | 0.89 (0.83–0.95)            | 3.52 (3.08–4.03)          | 1.33 (1.15–1.53)                  | 0.78 (0.68–0.90)            |
|                                |     | Women   | 2.93 (2.63–3.26)           | 1.22 (1.09–1.38)                  | 0.92 (0.82–1.04)            | 3.56 (2.95–4.29)          | 1.58 (1.29–1.92)                  | 1.01 (0.82–1.24)            |
|                                | ≥70 | Overall | 0.86 (0.80–0.92)           | 0.83 (0.78–0.88)                  | 0.76 (0.71–0.81)            | 0.97 (0.89–1.07)          | 0.83 (0.76–0.90)                  | 0.74 (0.68–0.81)            |
|                                |     | Men     | 0.88 (0.80–0.96)           | 0.85 (0.78–0.93)                  | 0.77 (0.71–0.84)            | 0.96 (0.84–1.09)          | 0.84 (0.74–0.94)                  | 0.73 (0.64–0.82)            |
|                                |     | Women   | 0.85 (0.76–0.94)           | 0.80 (0.72–0.88)                  | 0.76 (0.69–0.84)            | 1.03 (0.90–1.19)          | 0.82 (0.72–0.93)                  | 0.78 (0.68–0.88)            |

| Outcome                          | Age | Sex     | 1-28 days post-vaccination |                                   |                             | >28 days post vaccination |                                   |                             |
|----------------------------------|-----|---------|----------------------------|-----------------------------------|-----------------------------|---------------------------|-----------------------------------|-----------------------------|
|                                  |     |         | Unadjusted <sup>1</sup>    | Age and sex adjusted <sup>2</sup> | Fully adjusted <sup>3</sup> | Unadjusted <sup>1</sup>   | Age and sex adjusted <sup>2</sup> | Fully adjusted <sup>3</sup> |
| Ischaemic stroke <sup>4</sup>    | <70 | Overall | 3.21 (3.02–3.41)           | 1.25 (1.17–1.34)                  | 0.90 (0.84–0.96)            | 4.36 (3.91–4.86)          | 1.76 (1.56–1.98)                  | 0.94 (0.84–1.07)            |
|                                  |     | Men     | 3.73 (3.44–4.05)           | 1.28 (1.17–1.40)                  | 0.91 (0.83–0.99)            | 6.58 (5.73–7.57)          | 2.14 (1.84–2.49)                  | 1.12 (0.96–1.31)            |
|                                  |     | Women   | 2.91 (2.64–3.20)           | 1.21 (1.09–1.35)                  | 0.90 (0.81–1.00)            | 3.10 (2.59–3.71)          | 1.32 (1.09–1.59)                  | 0.77 (0.63–0.94)            |
|                                  | ≥70 | Overall | 0.92 (0.87–0.98)           | 0.85 (0.81–0.90)                  | 0.77 (0.73–0.82)            | 1.08 (0.99–1.18)          | 0.83 (0.77–0.90)                  | 0.72 (0.67–0.78)            |
|                                  |     | Men     | 0.94 (0.85–1.03)           | 0.89 (0.82–0.96)                  | 0.81 (0.74–0.88)            | 1.14 (1.01–1.30)          | 0.93 (0.83–1.04)                  | 0.82 (0.73–0.92)            |
|                                  |     | Women   | 0.92 (0.84–1.00)           | 0.82 (0.77–0.89)                  | 0.75 (0.69–0.80)            | 1.04 (0.92–1.17)          | 0.76 (0.68–0.84)                  | 0.66 (0.59–0.73)            |
| Other arterial                   | <70 | Overall | 3.18 (2.48–4.07)           | 1.24 (0.93–1.64)                  | 0.82 (0.63–1.07)            | 4.20 (2.62–6.73)          | 1.68 (0.99–2.86)                  | 0.77 (0.46–1.30)            |
|                                  |     | Men     | 3.17 (2.29–4.40)           | 1.05 (0.73–1.51)                  | 0.75 (0.53–1.07)            | 5.56 (3.07–10.06)         | 1.66 (0.86–3.20)                  | 0.89 (0.47–1.69)            |
|                                  |     | Women   | 3.67 (2.51–5.37)           | 1.59 (1.03–2.46)                  | 1.04 (0.68–1.59)            | 3.60 (1.64–7.91)          | 1.74 (0.73–4.18)                  | 0.83 (0.35–2.01)            |
|                                  | ≥70 | Overall | 0.44 (0.33–0.59)           | 0.45 (0.34–0.59)                  | 0.41 (0.31–0.53)            | 0.55 (0.38–0.79)          | 0.49 (0.35–0.70)                  | 0.44 (0.31–0.63)            |
|                                  |     | Men     | 0.46 (0.31–0.67)           | 0.45 (0.31–0.66)                  | 0.42 (0.29–0.61)            | 0.61 (0.35–1.05)          | 0.56 (0.33–0.95)                  | 0.51 (0.30–0.87)            |
|                                  |     | Women   | 0.43 (0.28–0.66)           | 0.44 (0.30–0.67)                  | 0.39 (0.26–0.59)            | 0.51 (0.30–0.86)          | 0.44 (0.27–0.71)                  | 0.38 (0.23–0.62)            |
| <b>Haematological events</b>     |     |         |                            |                                   |                             |                           |                                   |                             |
| Any thrombocytopenia             | <70 | Overall | 4.85 (3.87–6.07)           | 3.00 (2.34–3.85)                  | 1.71 (1.35–2.16)            | 7.48 (5.31–10.53)         | 4.68 (3.24–6.77)                  | 1.69 (1.16–2.46)            |
|                                  |     | Men     | 6.47 (4.62–9.06)           | 3.52 (2.42–5.13)                  | 1.85 (1.30–2.63)            | 13.2 (8.1–21.4)           | 6.84 (3.99–11.73)                 | 2.02 (1.18–3.44)            |
|                                  |     | Women   | 3.81 (2.80–5.17)           | 2.65 (1.89–3.71)                  | 1.95 (1.40–2.72)            | 4.59 (2.78–7.58)          | 3.34 (1.98–5.64)                  | 2.08 (1.22–3.54)            |
|                                  | ≥70 | Overall | 0.92 (0.65–1.29)           | 0.87 (0.63–1.22)                  | 0.79 (0.56–1.10)            | 1.14 (0.66–1.95)          | 0.99 (0.59–1.65)                  | 0.84 (0.50–1.41)            |
|                                  |     | Men     | 0.84 (0.53–1.32)           | 0.79 (0.50–1.22)                  | 0.68 (0.43–1.06)            | 1.37 (0.64–2.91)          | 1.17 (0.57–2.38)                  | 0.92 (0.45–1.90)            |
|                                  |     | Women   | 1.04 (0.62–1.75)           | 0.99 (0.61–1.63)                  | 0.93 (0.56–1.54)            | 1.02 (0.46–2.24)          | 0.88 (0.42–1.85)                  | 0.80 (0.38–1.70)            |
| <b>Other events</b>              |     |         |                            |                                   |                             |                           |                                   |                             |
| Haemorrhagic stroke <sup>5</sup> | <70 | Overall | 2.25 (1.88–2.69)           | 1.05 (0.86–1.27)                  | 1.00 (0.73–1.37)            | 2.87 (2.10–3.92)          | 1.39 (1.00–1.93)                  | 1.00 (0.51–1.95)            |
|                                  |     | Men     | 2.68 (2.11–3.41)           | 1.15 (0.89–1.49)                  | 1.01 (0.78–1.30)            | 2.86 (1.74–4.71)          | 1.21 (0.72–2.04)                  | 0.87 (0.52–1.46)            |
|                                  |     | Women   | 1.93 (1.48–2.52)           | 0.93 (0.70–1.24)                  | 0.87 (0.66–1.16)            | 2.94 (1.95–4.42)          | 1.47 (0.95–2.27)                  | 1.23 (0.80–1.91)            |
|                                  | ≥70 | Overall | 0.83 (0.69–1.00)           | 0.78 (0.66–0.92)                  | 0.73 (0.62–0.87)            | 1.09 (0.84–1.40)          | 0.84 (0.67–1.04)                  | 0.76 (0.61–0.95)            |
|                                  |     | Men     | 0.86 (0.65–1.14)           | 0.82 (0.64–1.05)                  | 0.79 (0.62–1.01)            | 1.34 (0.93–1.94)          | 1.03 (0.75–1.43)                  | 0.97 (0.70–1.34)            |
|                                  |     | Women   | 0.81 (0.63–1.03)           | 0.75 (0.60–0.94)                  | 0.70 (0.56–0.87)            | 0.92 (0.65–1.30)          | 0.71 (0.52–0.96)                  | 0.64 (0.47–0.86)            |
| Mesenteric thrombosis            | <70 | Overall | 3.25 (2.42–4.37)           | 1.24 (0.89–1.73)                  | 0.84 (0.61–1.16)            | 5.47 (3.33–8.99)          | 2.16 (1.24–3.77)                  | 1.04 (0.60–1.80)            |
|                                  |     | Men     | 2.87 (1.72–4.77)           | 0.98 (0.57–1.71)                  | 0.72 (0.43–1.22)            | 4.34 (1.59–11.83)         | 1.42 (0.48–4.25)                  | 0.75 (0.26–2.17)            |
|                                  |     | Women   | 3.39 (2.36–4.87)           | 1.43 (0.94–2.17)                  | 1.01 (0.67–1.52)            | 5.66 (3.21–9.99)          | 2.59 (1.36–4.94)                  | 1.40 (0.73–2.69)            |
|                                  | ≥70 | Overall | 0.66 (0.49–0.89)           | 0.60 (0.46–0.79)                  | 0.53 (0.41–0.70)            | 0.95 (0.64–1.43)          | 0.74 (0.52–1.05)                  | 0.62 (0.43–0.89)            |
|                                  |     | Men     | 0.65 (0.39–1.09)           | 0.61 (0.38–0.98)                  | 0.52 (0.32–0.83)            | 0.81 (0.44–1.49)          | 0.69 (0.40–1.18)                  | 0.54 (0.31–0.94)            |
|                                  |     | Women   | 0.66 (0.46–0.95)           | 0.60 (0.44–0.84)                  | 0.55 (0.40–0.77)            | 1.00 (0.60–1.68)          | 0.76 (0.48–1.20)                  | 0.67 (0.42–1.08)            |
| Lower limb fracture              | <70 | Overall | 1.71 (1.55–1.87)           | 1.01 (0.91–1.11)                  | 0.85 (0.77–0.93)            | 2.26 (1.91–2.67)          | 1.35 (1.13–1.60)                  | 0.98 (0.83–1.17)            |
|                                  |     | Men     | 1.35 (1.15–1.58)           | 0.98 (0.83–1.16)                  | 0.86 (0.73–1.02)            | 2.22 (1.67–2.93)          | 1.60 (1.20–2.14)                  | 1.24 (0.93–1.66)            |
|                                  |     | Women   | 1.91 (1.70–2.15)           | 1.03 (0.91–1.16)                  | 0.88 (0.78–0.99)            | 2.21 (1.80–2.72)          | 1.25 (1.01–1.55)                  | 0.95 (0.77–1.18)            |
|                                  | ≥70 | Overall | 1.11 (1.02–1.21)           | 0.94 (0.88–1.01)                  | 0.83 (0.78–0.89)            | 1.56 (1.39–1.76)          | 0.95 (0.87–1.04)                  | 0.78 (0.71–0.85)            |
|                                  |     | Men     | 1.06 (0.90–1.24)           | 0.94 (0.83–1.08)                  | 0.84 (0.73–0.95)            | 1.50 (1.19–1.89)          | 0.97 (0.81–1.17)                  | 0.81 (0.67–0.97)            |
|                                  |     | Women   | 1.11 (1.01–1.22)           | 0.95 (0.88–1.03)                  | 0.84 (0.77–0.91)            | 1.51 (1.32–1.73)          | 0.95 (0.85–1.06)                  | 0.78 (0.70–0.87)            |
| Death                            | <70 | Overall | 1.96 (1.87–2.06)           | 0.60 (0.57–0.63)                  | 0.37 (0.35–0.39)            | 4.51 (4.20–4.85)          | 1.41 (1.30–1.53)                  | 0.51 (0.47–0.56)            |
|                                  |     | Men     | 2.35 (2.20–2.51)           | 0.63 (0.58–0.67)                  | 0.44 (0.41–0.47)            | 6.47 (5.87–7.13)          | 1.57 (1.40–1.75)                  | 0.75 (0.67–0.85)            |
|                                  |     | Women   | 1.69 (1.56–1.82)           | 0.56 (0.52–0.61)                  | 0.36 (0.33–0.39)            | 3.48 (3.13–3.89)          | 1.21 (1.07–1.37)                  | 0.50 (0.44–0.57)            |
|                                  | ≥70 | Overall | 0.35 (0.34–0.36)           | 0.34 (0.33–0.35)                  | 0.28 (0.28–0.29)            | 0.49 (0.47–0.51)          | 0.38 (0.37–0.39)                  | 0.27 (0.26–0.28)            |
|                                  |     | Men     | 0.31 (0.30–0.32)           | 0.32 (0.31–0.33)                  | 0.26 (0.25–0.27)            | 0.44 (0.42–0.47)          | 0.37 (0.35–0.38)                  | 0.26 (0.24–0.27)            |
|                                  |     | Women   | 0.39 (0.37–0.40)           | 0.36 (0.35–0.37)                  | 0.30 (0.29–0.31)            | 0.54 (0.51–0.56)          | 0.39 (0.38–0.41)                  | 0.29 (0.27–0.30)            |

<sup>1</sup>Stratified by region

<sup>2</sup>Adjusted for age, age<sup>2</sup>, sex and stratified by region

<sup>3</sup>Adjusted for age, age<sup>2</sup>, sex, ethnicity, deprivation, smoking, previous diagnosis of cancer, number of unique diseases in the last year, surgery in the last year, obesity, liver disease; additionally for women aged <70, history of depression and total number of types of medication (by BNF chapters); additionally for men aged <70, history of SARS-CoV2 infection and thrombocytopenia; and additionally for men and women aged ≥70, chronic kidney disease and dementia. Venous events adjusted for: anticoagulant medication, combined oral contraceptive medication, hormone replacement therapy medication, history of PE or DVT, and history of coronavirus infection. Arterial thromboses adjusted for: diabetes, hypertension, smoking, antiplatelet medication, blood pressure lowering medication, lipid lowering medication, anticoagulant medication, history of stroke, and history of MI. All analyses stratified by region.

<sup>4</sup>Ischaemic stroke: including ischaemic stroke, stroke of uncertain cause, and spinal stroke

<sup>5</sup>Haemorrhagic stroke: including intracranial hemorrhage and subarachnoid hemorrhage

S1 Table (e): Hazard ratios (95% CIs) for thrombotic and other outcomes 1-28 and >28 days post-vaccination, compared with pre-vaccination rates. All analyses were stratified on geographical region BNT162b2 vaccine

| Outcome                        | Age | Sex     | 1-28 days post-vaccination |                               |                             | >28 days post vaccination |                               |                             |
|--------------------------------|-----|---------|----------------------------|-------------------------------|-----------------------------|---------------------------|-------------------------------|-----------------------------|
|                                |     |         | Unadjusted <sup>1</sup>    | Age sex adjusted <sup>2</sup> | Fully adjusted <sup>3</sup> | Unadjusted <sup>1</sup>   | Age sex adjusted <sup>2</sup> | Fully adjusted <sup>3</sup> |
| All venous events              | <70 | Overall | 1.47 (1.35–1.61)           | 1.01 (0.93–1.11)              | 0.81 (0.74–0.88)            | 1.14 (1.01–1.29)          | 0.88 (0.77–1.00)              | 0.73 (0.64–0.83)            |
|                                |     | Men     | 1.98 (1.75–2.23)           | 1.15 (1.01–1.30)              | 0.92 (0.81–1.05)            | 1.56 (1.28–1.89)          | 1.02 (0.83–1.25)              | 0.83 (0.68–1.02)            |
|                                |     | Women   | 1.20 (1.06–1.37)           | 0.91 (0.80–1.03)              | 0.74 (0.65–0.84)            | 1.01 (0.86–1.20)          | 0.81 (0.69–0.96)              | 0.70 (0.59–0.83)            |
|                                | ≥70 | Overall | 0.65 (0.60–0.71)           | 0.56 (0.52–0.61)              | 0.57 (0.53–0.62)            | 0.68 (0.62–0.75)          | 0.50 (0.46–0.55)              | 0.50 (0.45–0.55)            |
|                                |     | Men     | 0.67 (0.59–0.76)           | 0.59 (0.52–0.66)              | 0.60 (0.53–0.67)            | 0.75 (0.65–0.87)          | 0.59 (0.51–0.68)              | 0.58 (0.50–0.67)            |
|                                |     | Women   | 0.64 (0.58–0.72)           | 0.54 (0.49–0.60)              | 0.56 (0.50–0.63)            | 0.63 (0.56–0.72)          | 0.45 (0.40–0.51)              | 0.45 (0.40–0.52)            |
| Intracranial venous thrombosis | <70 | Overall | 0.76 (0.31–1.85)           | 0.72 (0.29–1.78)              | 0.59 (0.24–1.45)            | 0.65 (0.20–2.13)          | 0.59 (0.18–1.93)              | 0.51 (0.16–1.68)            |
|                                |     | Men     | 1.60 (0.50–5.16)           | 1.39 (0.43–4.49)              | 1.09 (0.33–3.61)            | 1.04 (0.14–7.77)          | 0.92 (0.12–7.05)              | 0.74 (0.10–5.62)            |
|                                |     | Women   | 0.39 (0.10–1.60)           | 0.44 (0.11–1.78)              | 0.37 (0.09–1.52)            | 0.48 (0.11–2.07)          | 0.51 (0.12–2.20)              | 0.45 (0.10–1.95)            |
|                                | ≥70 | Overall | 1.65 (0.64–4.29)           | 1.25 (0.48–3.26)              | 1.43 (0.55–3.75)            | 1.13 (0.13–9.75)          | 0.71 (0.08–6.56)              | 0.88 (0.10–7.52)            |
|                                |     | Men     | -                          | -                             | -                           | -                         | -                             | -                           |
|                                |     | Women   | 2.01 (0.69–5.88)           | 1.45 (0.49–4.26)              | 1.57 (0.54–4.54)            | 1.26 (0.13–11.94)         | 0.73 (0.07–7.29)              | 0.82 (0.09–7.61)            |
| Portal vein thrombosis         | <70 | Overall | 0.58 (0.15–2.30)           | 0.44 (0.11–1.72)              | 0.29 (0.07–1.17)            | 3.06 (1.29–7.24)          | 2.84 (1.19–6.74)              | 2.19 (0.89–5.37)            |
|                                |     | Men     | 1.28 (0.33–4.95)           | 0.81 (0.21–3.09)              | 0.51 (0.13–2.04)            | -                         | -                             | -                           |
|                                |     | Women   | -                          | -                             | -                           | 5.30 (1.98–14.22)         | 4.28 (1.55–11.78)             | 3.95 (1.39–11.20)           |
|                                | ≥70 | Overall | 0.49 (0.10–2.28)           | 0.43 (0.10–1.87)              | 0.42 (0.09–1.91)            | 0.67 (0.23–1.97)          | 0.54 (0.19–1.56)              | 0.48 (0.17–1.38)            |
|                                |     | Men     | 0.85 (0.17–4.38)           | 0.55 (0.11–2.66)              | 0.49 (0.10–2.46)            | 1.26 (0.36–4.41)          | 0.70 (0.23–2.17)              | 0.48 (0.17–1.38)            |
|                                |     | Women   | 0.22 (0.01–3.38)           | 0.24 (0.01–3.80)              | 0.26 (0.02–4.47)            | 0.37 (0.09–1.52)          | 0.44 (0.10–2.01)              | 0.46 (0.11–2.04)            |
| Pulmonary embolism             | <70 | Overall | 1.52 (1.36–1.71)           | 0.99 (0.87–1.11)              | 0.78 (0.69–0.88)            | 1.20 (1.02–1.43)          | 0.89 (0.75–1.06)              | 0.71 (0.60–0.85)            |
|                                |     | Men     | 1.93 (1.63–2.28)           | 1.05 (0.88–1.25)              | 0.85 (0.71–1.01)            | 1.56 (1.19–2.05)          | 0.97 (0.74–1.29)              | 0.77 (0.58–1.03)            |
|                                |     | Women   | 1.32 (1.13–1.56)           | 0.94 (0.79–1.10)              | 0.75 (0.64–0.89)            | 1.10 (0.88–1.37)          | 0.84 (0.67–1.05)              | 0.71 (0.57–0.89)            |
|                                | ≥70 | Overall | 0.61 (0.55–0.68)           | 0.53 (0.48–0.59)              | 0.54 (0.49–0.60)            | 0.61 (0.54–0.69)          | 0.45 (0.40–0.51)              | 0.45 (0.39–0.50)            |
|                                |     | Men     | 0.64 (0.55–0.75)           | 0.56 (0.48–0.65)              | 0.57 (0.49–0.66)            | 0.65 (0.54–0.77)          | 0.50 (0.42–0.59)              | 0.49 (0.41–0.59)            |
|                                |     | Women   | 0.59 (0.52–0.68)           | 0.51 (0.44–0.58)              | 0.52 (0.45–0.60)            | 0.58 (0.49–0.68)          | 0.42 (0.36–0.49)              | 0.42 (0.36–0.49)            |
| Deep vein thrombosis           | <70 | Overall | 1.38 (1.21–1.59)           | 1.03 (0.89–1.18)              | 0.82 (0.71–0.95)            | 1.05 (0.86–1.28)          | 0.85 (0.69–1.04)              | 0.73 (0.59–0.89)            |
|                                |     | Men     | 1.93 (1.60–2.33)           | 1.23 (1.01–1.49)              | 0.99 (0.81–1.20)            | 1.55 (1.15–2.10)          | 1.10 (0.81–1.48)              | 0.94 (0.69–1.28)            |
|                                |     | Women   | 1.08 (0.88–1.33)           | 0.87 (0.71–1.08)              | 0.72 (0.58–0.89)            | 0.88 (0.67–1.15)          | 0.74 (0.56–0.97)              | 0.65 (0.50–0.86)            |
|                                | ≥70 | Overall | 0.69 (0.60–0.79)           | 0.58 (0.51–0.67)              | 0.61 (0.53–0.70)            | 0.81 (0.69–0.96)          | 0.59 (0.50–0.70)              | 0.61 (0.52–0.73)            |
|                                |     | Men     | 0.66 (0.53–0.82)           | 0.59 (0.48–0.73)              | 0.61 (0.49–0.76)            | 0.95 (0.74–1.23)          | 0.78 (0.60–1.01)              | 0.80 (0.61–1.05)            |
|                                |     | Women   | 0.71 (0.59–0.85)           | 0.59 (0.49–0.70)              | 0.62 (0.52–0.74)            | 0.72 (0.58–0.90)          | 0.49 (0.40–0.61)              | 0.52 (0.41–0.64)            |
| Other                          | <70 | Overall | 2.16 (1.47–3.19)           | 1.60 (1.07–2.37)              | 1.18 (0.79–1.77)            | 1.64 (0.93–2.90)          | 1.34 (0.75–2.40)              | 1.03 (0.57–1.87)            |
|                                |     | Men     | 3.25 (1.93–5.50)           | 2.03 (1.16–3.54)              | 1.46 (0.83–2.57)            | 2.14 (0.86–5.34)          | 1.51 (0.59–3.86)              | 1.03 (0.39–2.70)            |
|                                |     | Women   | 1.48 (0.82–2.65)           | 1.20 (0.67–2.16)              | 0.98 (0.54–1.77)            | 1.55 (0.75–3.21)          | 1.31 (0.63–2.74)              | 1.21 (0.57–2.55)            |
|                                | ≥70 | Overall | 1.13 (0.66–1.94)           | 0.97 (0.58–1.64)              | 1.01 (0.60–1.72)            | 0.86 (0.39–1.88)          | 0.66 (0.31–1.41)              | 0.67 (0.30–1.47)            |
|                                |     | Men     | 1.50 (0.77–2.95)           | 1.25 (0.65–2.42)              | 1.27 (0.64–2.49)            | 1.51 (0.50–4.51)          | 1.09 (0.36–3.34)              | 1.07 (0.33–3.44)            |
|                                |     | Women   | 0.79 (0.31–2.04)           | 0.72 (0.30–1.75)              | 0.75 (0.30–1.85)            | 0.42 (0.17–1.06)          | 0.36 (0.15–0.88)              | 0.36 (0.14–0.91)            |
| All arterial events            | <70 | Overall | 2.21 (2.12–2.31)           | 1.31 (1.25–1.37)              | 0.94 (0.90–0.99)            | 1.45 (1.35–1.55)          | 1.08 (1.01–1.16)              | 0.88 (0.82–0.95)            |
|                                |     | Men     | 3.06 (2.90–3.22)           | 1.44 (1.36–1.52)              | 0.99 (0.93–1.05)            | 2.17 (1.99–2.38)          | 1.19 (1.08–1.31)              | 0.91 (0.82–1.00)            |
|                                |     | Women   | 1.85 (1.71–1.99)           | 1.11 (1.02–1.20)              | 0.92 (0.84–0.99)            | 1.44 (1.30–1.60)          | 0.96 (0.86–1.07)              | 0.91 (0.81–1.02)            |
|                                | ≥70 | Overall | 0.90 (0.87–0.93)           | 0.69 (0.66–0.71)              | 0.72 (0.70–0.75)            | 1.15 (1.10–1.20)          | 0.69 (0.66–0.72)              | 0.71 (0.68–0.74)            |
|                                |     | Men     | 0.96 (0.91–1.00)           | 0.75 (0.71–0.78)              | 0.77 (0.73–0.81)            | 1.17 (1.11–1.25)          | 0.74 (0.70–0.79)              | 0.74 (0.70–0.79)            |
|                                |     | Women   | 0.84 (0.80–0.89)           | 0.63 (0.60–0.66)              | 0.68 (0.65–0.71)            | 1.13 (1.06–1.20)          | 0.64 (0.61–0.68)              | 0.68 (0.64–0.73)            |
| Myocardial infarction          | <70 | Overall | 2.24 (2.12–2.37)           | 1.39 (1.30–1.47)              | 0.94 (0.88–1.00)            | 1.42 (1.29–1.55)          | 1.14 (1.04–1.26)              | 0.88 (0.80–0.97)            |
|                                |     | Men     | 3.07 (2.87–3.28)           | 1.51 (1.40–1.62)              | 0.97 (0.90–1.05)            | 1.98 (1.76–2.23)          | 1.13 (1.00–1.28)              | 0.81 (0.71–0.93)            |
|                                |     | Women   | 1.94 (1.74–2.17)           | 1.15 (1.03–1.30)              | 0.94 (0.83–1.06)            | 1.78 (1.54–2.05)          | 1.18 (1.02–1.37)              | 1.11 (0.95–1.30)            |
|                                | ≥70 | Overall | 0.93 (0.88–0.98)           | 0.74 (0.71–0.78)              | 0.74 (0.70–0.78)            | 1.19 (1.12–1.27)          | 0.78 (0.73–0.83)              | 0.75 (0.70–0.80)            |
|                                |     | Men     | 0.99 (0.92–1.06)           | 0.81 (0.76–0.86)              | 0.79 (0.73–0.84)            | 1.20 (1.10–1.31)          | 0.82 (0.76–0.89)              | 0.76 (0.70–0.83)            |
|                                |     | Women   | 0.85 (0.78–0.92)           | 0.66 (0.61–0.72)              | 0.69 (0.63–0.74)            | 1.20 (1.08–1.33)          | 0.74 (0.67–0.81)              | 0.74 (0.67–0.82)            |

| Outcome                          | Age | Sex     | 1-28 days post-vaccination |                               |                             | >28 days post vaccination |                               |                             |
|----------------------------------|-----|---------|----------------------------|-------------------------------|-----------------------------|---------------------------|-------------------------------|-----------------------------|
|                                  |     |         | Unadjusted <sup>1</sup>    | Age sex adjusted <sup>2</sup> | Fully adjusted <sup>3</sup> | Unadjusted <sup>1</sup>   | Age sex adjusted <sup>2</sup> | Fully adjusted <sup>3</sup> |
| Ischaemic stroke <sup>4</sup>    | <70 | Overall | 2.18 (2.05–2.33)           | 1.23 (1.14–1.31)              | 0.90 (0.83–0.97)            | 1.46 (1.32–1.62)          | 1.00 (0.89–1.11)              | 0.80 (0.72–0.90)            |
|                                  |     | Men     | 3.05 (2.80–3.32)           | 1.38 (1.26–1.51)              | 0.95 (0.86–1.05)            | 2.40 (2.08–2.77)          | 1.26 (1.09–1.46)              | 0.91 (0.78–1.07)            |
|                                  |     | Women   | 1.76 (1.59–1.96)           | 1.05 (0.94–1.17)              | 0.85 (0.76–0.95)            | 1.18 (1.01–1.38)          | 0.77 (0.66–0.90)              | 0.73 (0.61–0.86)            |
|                                  | ≥70 | Overall | 0.88 (0.84–0.93)           | 0.65 (0.63–0.68)              | 0.71 (0.68–0.75)            | 1.13 (1.06–1.19)          | 0.64 (0.60–0.67)              | 0.69 (0.66–0.73)            |
|                                  |     | Men     | 0.94 (0.88–1.00)           | 0.71 (0.66–0.75)              | 0.77 (0.72–0.82)            | 1.17 (1.07–1.27)          | 0.69 (0.64–0.75)              | 0.75 (0.69–0.81)            |
|                                  |     | Women   | 0.84 (0.78–0.89)           | 0.61 (0.58–0.65)              | 0.68 (0.63–0.72)            | 1.09 (1.01–1.19)          | 0.60 (0.56–0.65)              | 0.66 (0.61–0.71)            |
| Other arterial                   | <70 | Overall | 1.72 (1.28–2.31)           | 0.95 (0.70–1.30)              | 0.69 (0.50–0.94)            | 1.63 (1.10–2.43)          | 1.13 (0.74–1.72)              | 0.85 (0.55–1.32)            |
|                                  |     | Men     | 2.31 (1.58–3.37)           | 0.99 (0.66–1.49)              | 0.71 (0.47–1.07)            | 3.22 (2.02–5.13)          | 1.56 (0.95–2.58)              | 1.16 (0.69–1.96)            |
|                                  |     | Women   | 1.46 (0.90–2.37)           | 0.88 (0.54–1.45)              | 0.69 (0.42–1.15)            | 0.93 (0.43–1.99)          | 0.65 (0.30–1.43)              | 0.59 (0.26–1.33)            |
|                                  | ≥70 | Overall | 0.59 (0.46–0.76)           | 0.51 (0.40–0.65)              | 0.52 (0.41–0.67)            | 0.64 (0.47–0.85)          | 0.47 (0.35–0.62)              | 0.46 (0.34–0.62)            |
|                                  |     | Men     | 0.49 (0.35–0.69)           | 0.46 (0.32–0.65)              | 0.47 (0.33–0.66)            | 0.52 (0.37–0.74)          | 0.46 (0.32–0.66)              | 0.44 (0.31–0.64)            |
|                                  |     | Women   | 0.74 (0.51–1.08)           | 0.59 (0.41–0.84)              | 0.60 (0.42–0.85)            | 0.83 (0.50–1.37)          | 0.50 (0.31–0.79)              | 0.49 (0.30–0.78)            |
| <b>Haematological events</b>     |     |         |                            |                               |                             |                           |                               |                             |
| Any thrombocytopenia             | <70 | Overall | 2.10 (1.60–2.77)           | 1.48 (1.11–1.97)              | 1.00 (0.75–1.34)            | 2.03 (1.42–2.92)          | 1.54 (1.07–2.23)              | 0.97 (0.66–1.41)            |
|                                  |     | Men     | 3.31 (2.23–4.91)           | 2.07 (1.35–3.16)              | 1.19 (0.78–1.83)            | 2.95 (1.61–5.42)          | 2.02 (1.08–3.79)              | 0.93 (0.49–1.78)            |
|                                  |     | Women   | 1.50 (1.01–2.22)           | 1.17 (0.78–1.74)              | 0.97 (0.65–1.46)            | 1.58 (1.00–2.50)          | 1.32 (0.83–2.08)              | 1.14 (0.72–1.80)            |
|                                  | ≥70 | Overall | 0.85 (0.64–1.13)           | 0.72 (0.54–0.95)              | 0.68 (0.51–0.90)            | 1.22 (0.87–1.71)          | 0.90 (0.64–1.25)              | 0.79 (0.56–1.12)            |
|                                  |     | Men     | 0.87 (0.61–1.26)           | 0.73 (0.51–1.05)              | 0.68 (0.47–0.97)            | 1.55 (1.03–2.32)          | 1.12 (0.75–1.67)              | 0.95 (0.62–1.46)            |
|                                  |     | Women   | 0.82 (0.53–1.29)           | 0.71 (0.46–1.09)              | 0.68 (0.44–1.07)            | 0.84 (0.48–1.48)          | 0.63 (0.36–1.09)              | 0.57 (0.32–1.02)            |
| <b>Other events</b>              |     |         |                            |                               |                             |                           |                               |                             |
| Haemorrhagic stroke <sup>5</sup> | <70 | Overall | 1.39 (1.13–1.71)           | 0.83 (0.67–1.03)              | 0.77 (0.62–0.96)            | 1.31 (1.00–1.73)          | 0.90 (0.68–1.19)              | 0.86 (0.65–1.15)            |
|                                  |     | Men     | 1.65 (1.22–2.23)           | 0.86 (0.63–1.18)              | 0.77 (0.57–1.05)            | 1.43 (0.89–2.29)          | 0.86 (0.53–1.40)              | 0.77 (0.47–1.25)            |
|                                  |     | Women   | 1.28 (0.95–1.72)           | 0.80 (0.59–1.08)              | 0.78 (0.58–1.05)            | 1.34 (0.95–1.88)          | 0.89 (0.62–1.26)              | 0.92 (0.65–1.31)            |
|                                  | ≥70 | Overall | 0.80 (0.69–0.91)           | 0.59 (0.52–0.68)              | 0.65 (0.57–0.74)            | 1.28 (1.09–1.50)          | 0.72 (0.62–0.84)              | 0.80 (0.68–0.94)            |
|                                  |     | Men     | 0.82 (0.67–1.01)           | 0.59 (0.48–0.71)              | 0.64 (0.52–0.78)            | 1.45 (1.14–1.83)          | 0.78 (0.62–0.98)              | 0.86 (0.68–1.09)            |
|                                  |     | Women   | 0.78 (0.65–0.94)           | 0.60 (0.50–0.72)              | 0.66 (0.55–0.79)            | 1.16 (0.93–1.44)          | 0.68 (0.56–0.84)              | 0.76 (0.61–0.93)            |
| Mesenteric thrombosis            | <70 | Overall | 1.61 (1.10–2.36)           | 0.84 (0.56–1.26)              | 0.65 (0.43–0.97)            | 1.77 (1.11–2.84)          | 1.08 (0.66–1.75)              | 0.83 (0.50–1.37)            |
|                                  |     | Men     | 2.91 (1.78–4.75)           | 1.29 (0.77–2.17)              | 0.97 (0.57–1.64)            | 2.21 (0.99–4.94)          | 1.15 (0.50–2.62)              | 0.82 (0.35–1.91)            |
|                                  |     | Women   | 0.91 (0.49–1.67)           | 0.55 (0.29–1.03)              | 0.45 (0.23–0.86)            | 1.61 (0.90–2.88)          | 1.09 (0.60–1.98)              | 0.94 (0.50–1.75)            |
|                                  | ≥70 | Overall | 0.72 (0.57–0.90)           | 0.54 (0.43–0.67)              | 0.54 (0.44–0.68)            | 1.06 (0.81–1.37)          | 0.61 (0.48–0.78)              | 0.59 (0.45–0.76)            |
|                                  |     | Men     | 0.57 (0.37–0.86)           | 0.41 (0.27–0.61)              | 0.42 (0.28–0.62)            | 0.82 (0.53–1.29)          | 0.44 (0.29–0.66)              | 0.42 (0.27–0.65)            |
|                                  |     | Women   | 0.80 (0.61–1.04)           | 0.61 (0.47–0.80)              | 0.62 (0.48–0.81)            | 1.18 (0.86–1.63)          | 0.72 (0.53–0.98)              | 0.70 (0.51–0.96)            |
| Lower limb fracture              | <70 | Overall | 1.44 (1.31–1.59)           | 1.03 (0.93–1.14)              | 0.93 (0.84–1.02)            | 1.24 (1.08–1.42)          | 0.95 (0.83–1.09)              | 0.89 (0.78–1.03)            |
|                                  |     | Men     | 1.19 (0.99–1.42)           | 0.94 (0.78–1.12)              | 0.85 (0.71–1.02)            | 0.99 (0.74–1.31)          | 0.83 (0.62–1.11)              | 0.80 (0.60–1.07)            |
|                                  |     | Women   | 1.49 (1.33–1.67)           | 1.08 (0.96–1.21)              | 0.98 (0.87–1.10)            | 1.27 (1.09–1.48)          | 1.00 (0.85–1.17)              | 0.94 (0.80–1.11)            |
|                                  | ≥70 | Overall | 0.99 (0.93–1.05)           | 0.65 (0.62–0.69)              | 0.69 (0.66–0.73)            | 1.48 (1.38–1.59)          | 0.67 (0.63–0.72)              | 0.71 (0.66–0.76)            |
|                                  |     | Men     | 0.95 (0.85–1.06)           | 0.58 (0.52–0.64)              | 0.63 (0.57–0.70)            | 1.60 (1.40–1.83)          | 0.65 (0.57–0.73)              | 0.69 (0.61–0.79)            |
|                                  |     | Women   | 1.00 (0.93–1.07)           | 0.68 (0.64–0.73)              | 0.72 (0.67–0.77)            | 1.42 (1.30–1.55)          | 0.68 (0.63–0.73)              | 0.71 (0.65–0.77)            |
| Death                            | <70 | Overall | 0.74 (0.69–0.79)           | 0.35 (0.32–0.37)              | 0.24 (0.22–0.26)            | 0.91 (0.84–1.00)          | 0.52 (0.48–0.57)              | 0.33 (0.30–0.37)            |
|                                  |     | Men     | 1.06 (0.97–1.17)           | 0.39 (0.36–0.43)              | 0.28 (0.25–0.31)            | 1.62 (1.44–1.82)          | 0.69 (0.61–0.79)              | 0.44 (0.39–0.51)            |
|                                  |     | Women   | 0.56 (0.50–0.63)           | 0.29 (0.26–0.33)              | 0.22 (0.19–0.25)            | 0.66 (0.58–0.75)          | 0.38 (0.34–0.44)              | 0.28 (0.25–0.33)            |
|                                  | ≥70 | Overall | 0.22 (0.22–0.23)           | 0.16 (0.16–0.16)              | 0.19 (0.19–0.20)            | 0.30 (0.29–0.31)          | 0.16 (0.16–0.16)              | 0.19 (0.18–0.19)            |
|                                  |     | Men     | 0.23 (0.22–0.24)           | 0.16 (0.15–0.16)              | 0.19 (0.18–0.20)            | 0.33 (0.32–0.34)          | 0.16 (0.15–0.17)              | 0.19 (0.18–0.19)            |
|                                  |     | Women   | 0.21 (0.20–0.22)           | 0.16 (0.16–0.17)              | 0.20 (0.19–0.20)            | 0.27 (0.26–0.28)          | 0.16 (0.15–0.17)              | 0.19 (0.18–0.19)            |

<sup>1</sup>Stratified by region

<sup>2</sup>Adjusted for age, age<sup>2</sup>, sex and stratified by region

<sup>3</sup>Adjusted for age, age<sup>2</sup>, sex, ethnicity, deprivation, smoking, previous diagnosis of cancer, number of unique diseases in the last year, surgery in the last year, obesity, liver disease; additionally for women aged <70, history of depression and total number of types of medication (by BNF chapters); additionally for men aged <70, history of SARS-CoV2 infection and thrombocytopenia; and additionally for men and women aged ≥70, chronic kidney disease and dementia. Venous events adjusted for: anticoagulant medication, combined oral contraceptive medication, hormone replacement therapy medication, history of PE or DVT, and history of coronavirus infection. Arterial thromboses adjusted for: diabetes, hypertension, smoking, antiplatelet medication, blood pressure lowering medication, lipid lowering medication, anticoagulant medication, history of stroke, and history of MI. All analyses stratified by region.

<sup>4</sup>Ischaemic stroke: including ischaemic stroke, stroke of uncertain cause, and spinal stroke

<sup>5</sup>Haemorrhagic stroke: including intracranial hemorrhage and subarachnoid hemorrhage
