# Supplementary material for: Association of COVID-19 vaccines ChAdOx1 and BNT162b2 with major venous, arterial, or thrombocytopenic events: A population-based cohort study of 46 million adults in England
Source: PubMed Central journal article supplement (PMC8863280; doi:10.1371/journal.pmed.1003926), 2022-02-22
Supplement: pmed.1003926.s005.pdf [file pmed.1003926.s005.pdf]

**S3 table. Characteristics of patient who had an ICVT event before and after vaccination. Only percentage are presented, as disclosure control does not allow numbers <5 to be released**

|                                  |                                    | ICVT before vaccination % | ICVT after ChAdOx1, % | ICVT after BNT162b, % | p-value <sup>1</sup> |
|----------------------------------|------------------------------------|---------------------------|-----------------------|-----------------------|----------------------|
| N                                |                                    | <210                      | <40                   | <20                   | <0.0001              |
| Sex                              | Male                               | 40                        | 33                    | 21                    | 0.24                 |
|                                  | Female                             | 60                        | 67                    | 79                    |                      |
| Age                              | 18 - 29                            | 19                        | 17                    | 0                     | <0.0001              |
|                                  | 30 - 49                            | 42                        | 22                    | 26                    |                      |
|                                  | 50 - 69                            | 30                        | 36                    | 16                    |                      |
|                                  | 70 - 79                            | 6                         | 11                    | 21                    |                      |
|                                  | 80+                                | 3                         | 14                    | 37                    |                      |
| Ethnicity                        | Asian or Asian British             | 15                        | 6                     | 0                     | 0.38                 |
|                                  | Black or Black British             | 5                         | 3                     | 0                     |                      |
|                                  | Mixed                              | 2                         | 0                     | 0                     |                      |
|                                  | Other ethnic groups                | 1                         | 0                     | 0                     |                      |
|                                  | White                              | 75                        | 92                    | 100                   |                      |
|                                  | Unknown or missing                 | 1                         | 0                     | 0                     |                      |
| Deprivation <sup>2</sup>         | 1 - 2                              | 29                        | 17                    | 11                    | 0.19                 |
|                                  | 3 - 4                              | 20                        | 14                    | 26                    |                      |
|                                  | 5 - 6                              | 25                        | 25                    | 21                    |                      |
|                                  | 7 - 8                              | 13                        | 25                    | 16                    |                      |
|                                  | 9 - 10                             | 13                        | 19                    | 26                    |                      |
| Smoking status                   | Current                            | 19                        | 28                    | 11                    | 0.5                  |
|                                  | Former                             | 21                        | 17                    | 32                    |                      |
|                                  | Never                              | 57                        | 56                    | 58                    |                      |
| Medical history                  | Stroke                             | 5                         | 6                     | 11                    | <0.0001              |
|                                  | MI                                 | 3                         | 6                     | 0                     | 0.01                 |
|                                  | DVT or PE                          | 8                         | 6                     | 5                     | <0.0001              |
|                                  | Thrombophilia                      | 1                         | 0                     | 0                     | 0.05                 |
|                                  | Coronavirus infection <sup>3</sup> | 6                         | 6                     | 0                     | <0.0001              |
|                                  | Diabetes                           | 10                        | 17                    | 37                    | <0.0001              |
|                                  | Depression                         | 26                        | 36                    | 16                    | <0.0001              |
|                                  | Obesity                            | 37                        | 31                    | 42                    | <0.0001              |
|                                  | Cancer                             | 17                        | 28                    | 37                    | <0.0001              |
|                                  | COPD                               | 2                         | 11                    | 16                    | 0.78                 |
|                                  | Liver disease                      | <1                        | 3                     | 0                     | 0.61                 |
|                                  | CKD                                | 5                         | 11                    | 32                    | 0.25                 |
|                                  | Major surgery <sup>4</sup>         | 18                        | 8                     | 11                    | <0.0001              |
| Dementia                         | 2                                  | 3                         | 0                     | 0.03                  |                      |
| Medications                      | Antiplatelet                       | 5                         | 6                     | 16                    | 0.01                 |
|                                  | BP lowering                        | 15                        | 28                    | 42                    | <0.0001              |
|                                  | Lipid lowering                     | 12                        | 22                    | 26                    | <0.0001              |
|                                  | Anticoagulant                      | 10                        | 11                    | 11                    | <0.0001              |
|                                  | Oral contraceptive                 | 4                         | 0                     | 0                     | <0.0001              |
|                                  | HRT                                | 1                         | 0                     | 0                     | 0.05                 |
| Number of diagnoses <sup>5</sup> | 0                                  | 71                        | 50                    | 58                    | 0.04                 |
|                                  | 1 - 5                              | 29                        | 50                    | 42                    |                      |
| Number of medications            | 0                                  | 31                        | 11                    | 2                     | 0.02                 |
|                                  | 1 - 5                              | 62                        | 83                    | 5                     |                      |
|                                  | 6+                                 | 7                         | 6                     | 2                     |                      |

<sup>1</sup> Approximation if Chi squared test included one or more zero counts; <sup>2</sup> Index of Multiple Deprivation deciles where 1 indicates least deprived and 10 indicates most deprived; <sup>3</sup> After 31/12/2019 and prior to 08/12/2020; <sup>4</sup> In the last year; <sup>5</sup> The category '6+' contained no individuals and so was excluded.
