# Supplementary material for: Association of COVID-19 vaccines ChAdOx1 and BNT162b2 with major venous, arterial, or thrombocytopenic events: A population-based cohort study of 46 million adults in England
Source: PubMed Central journal article supplement (PMC8863280; doi:10.1371/journal.pmed.1003926), 2022-02-22
Supplement: pmed.1003926.s007.pdf [file pmed.1003926.s007.pdf]

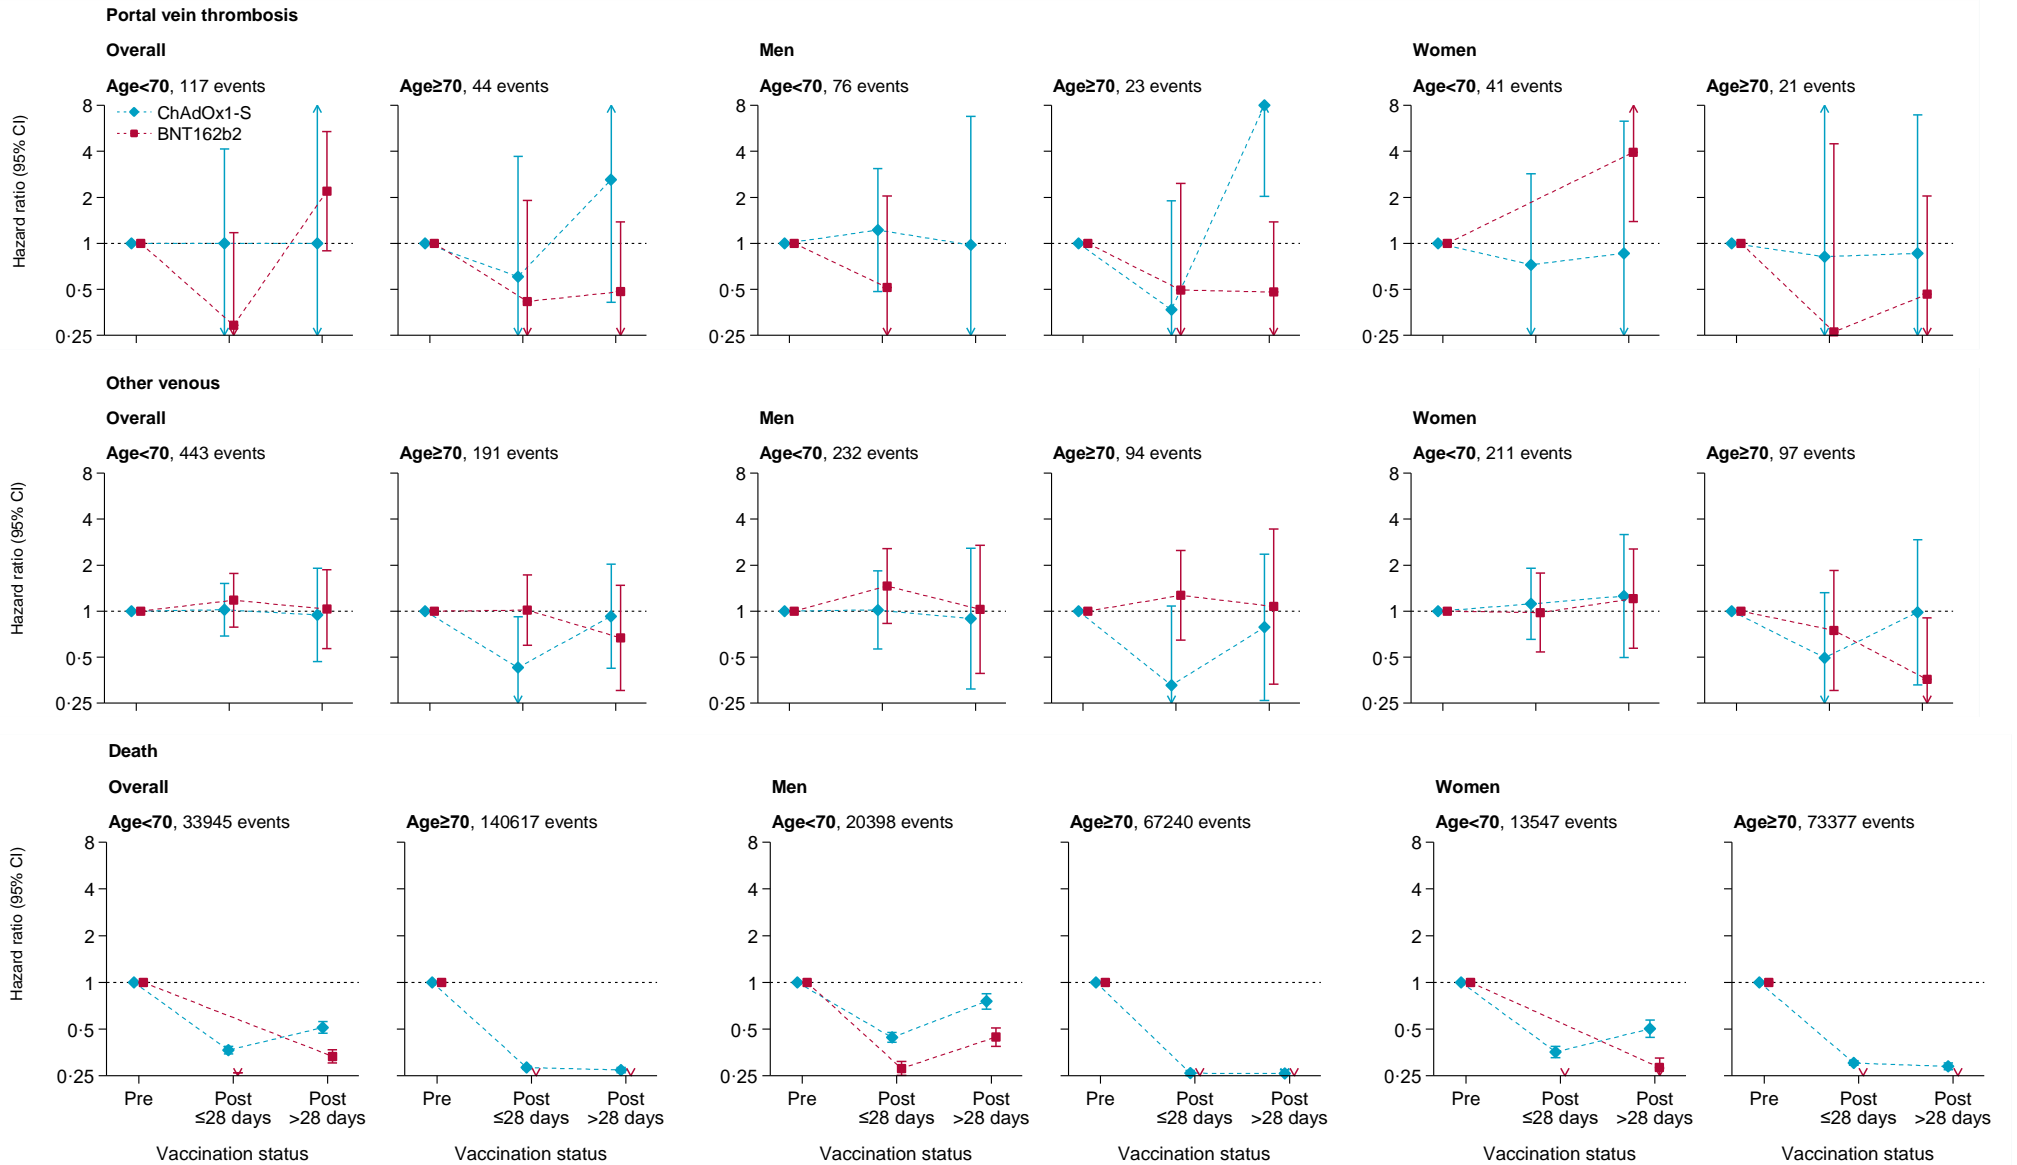

**S2 Figure: Adjusted hazard ratios for portal vein thrombosis, other venous events, and death after ChAdOx1-S or BNT162b2 vaccine**
