# Supplementary material for: Association of COVID-19 vaccines ChAdOx1 and BNT162b2 with major venous, arterial, or thrombocytopenic events: A population-based cohort study of 46 million adults in England
Source: PubMed Central journal article supplement (PMC8863280; doi:10.1371/journal.pmed.1003926), 2022-02-22

### A Venous

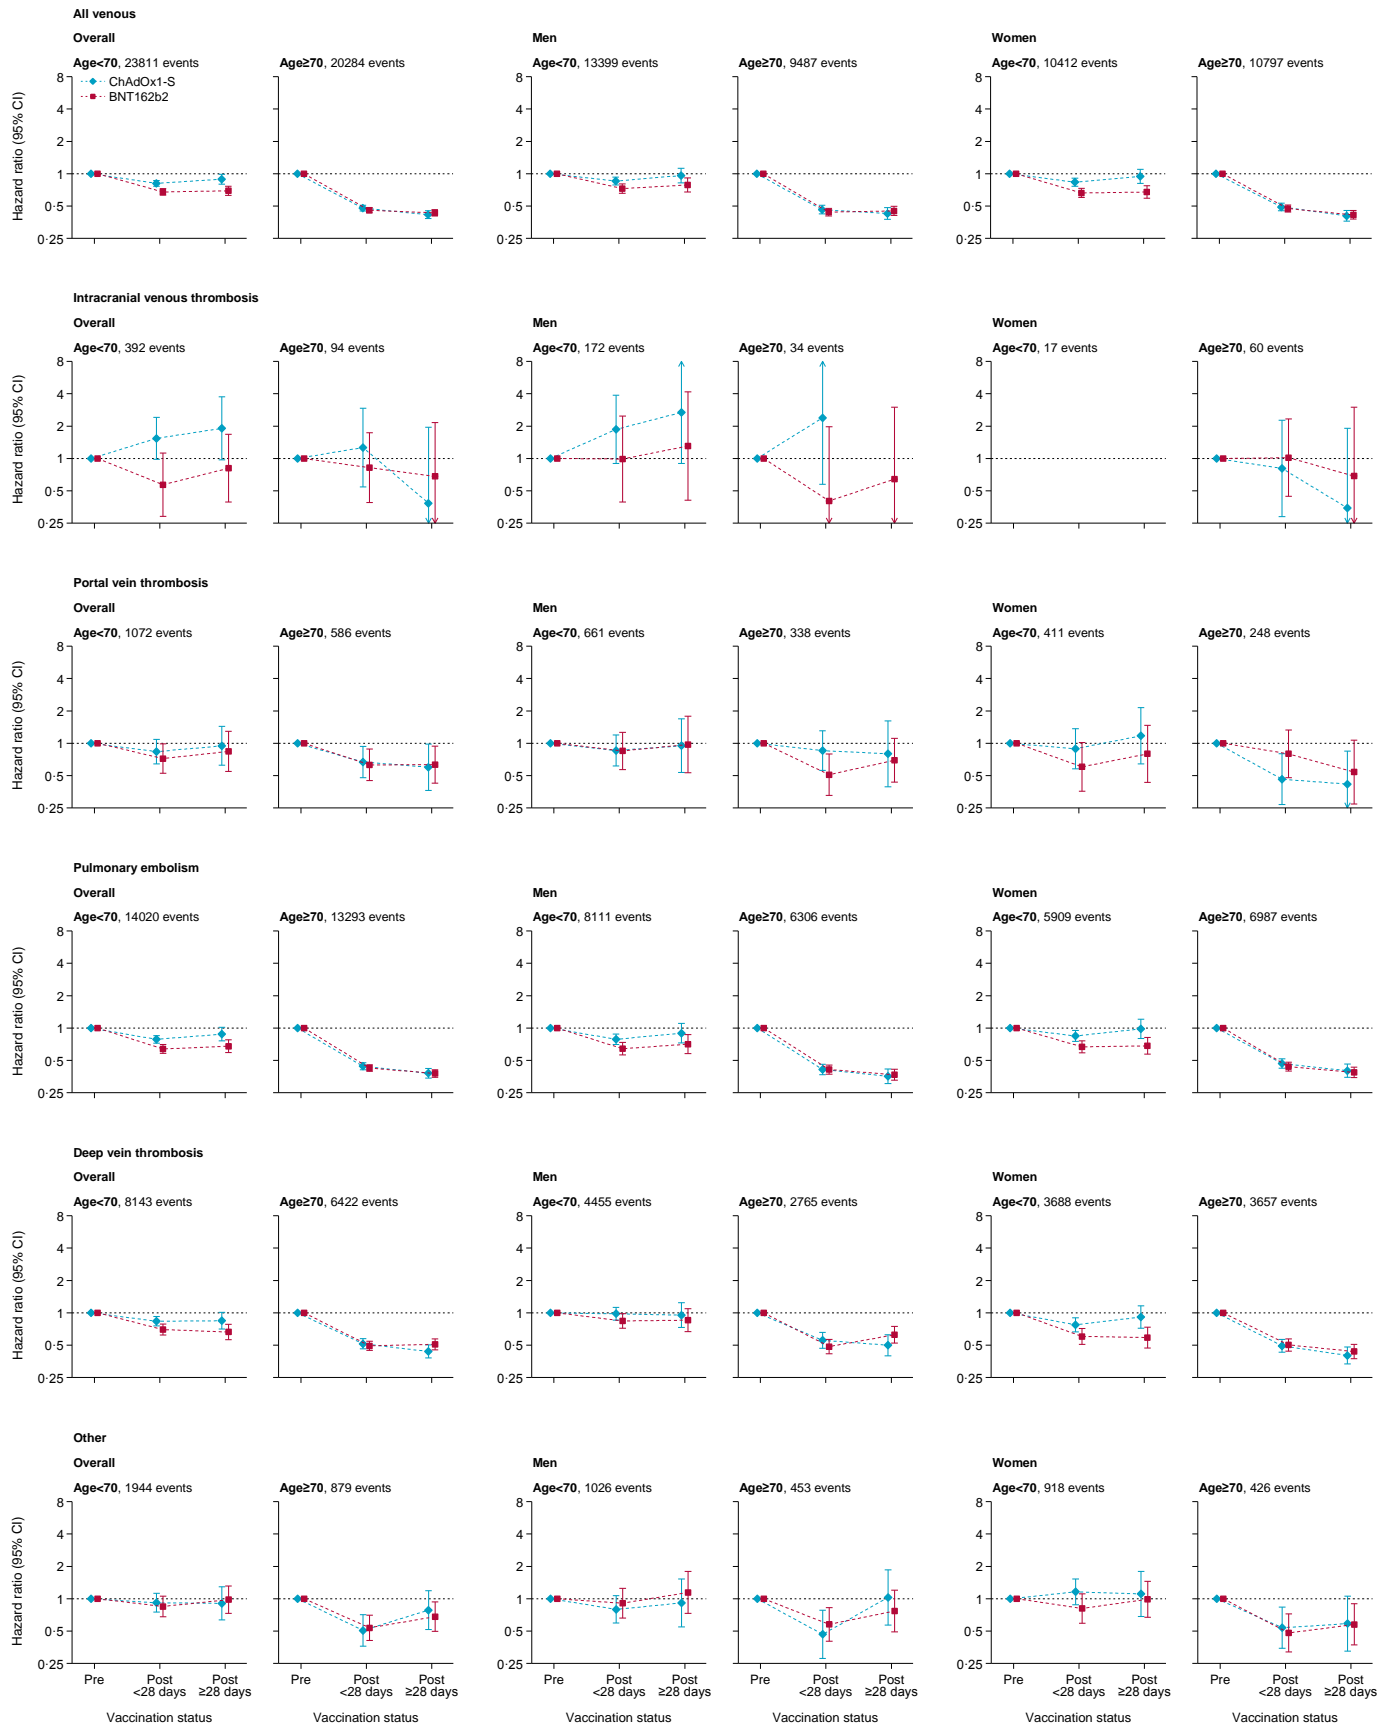

## B Arterial

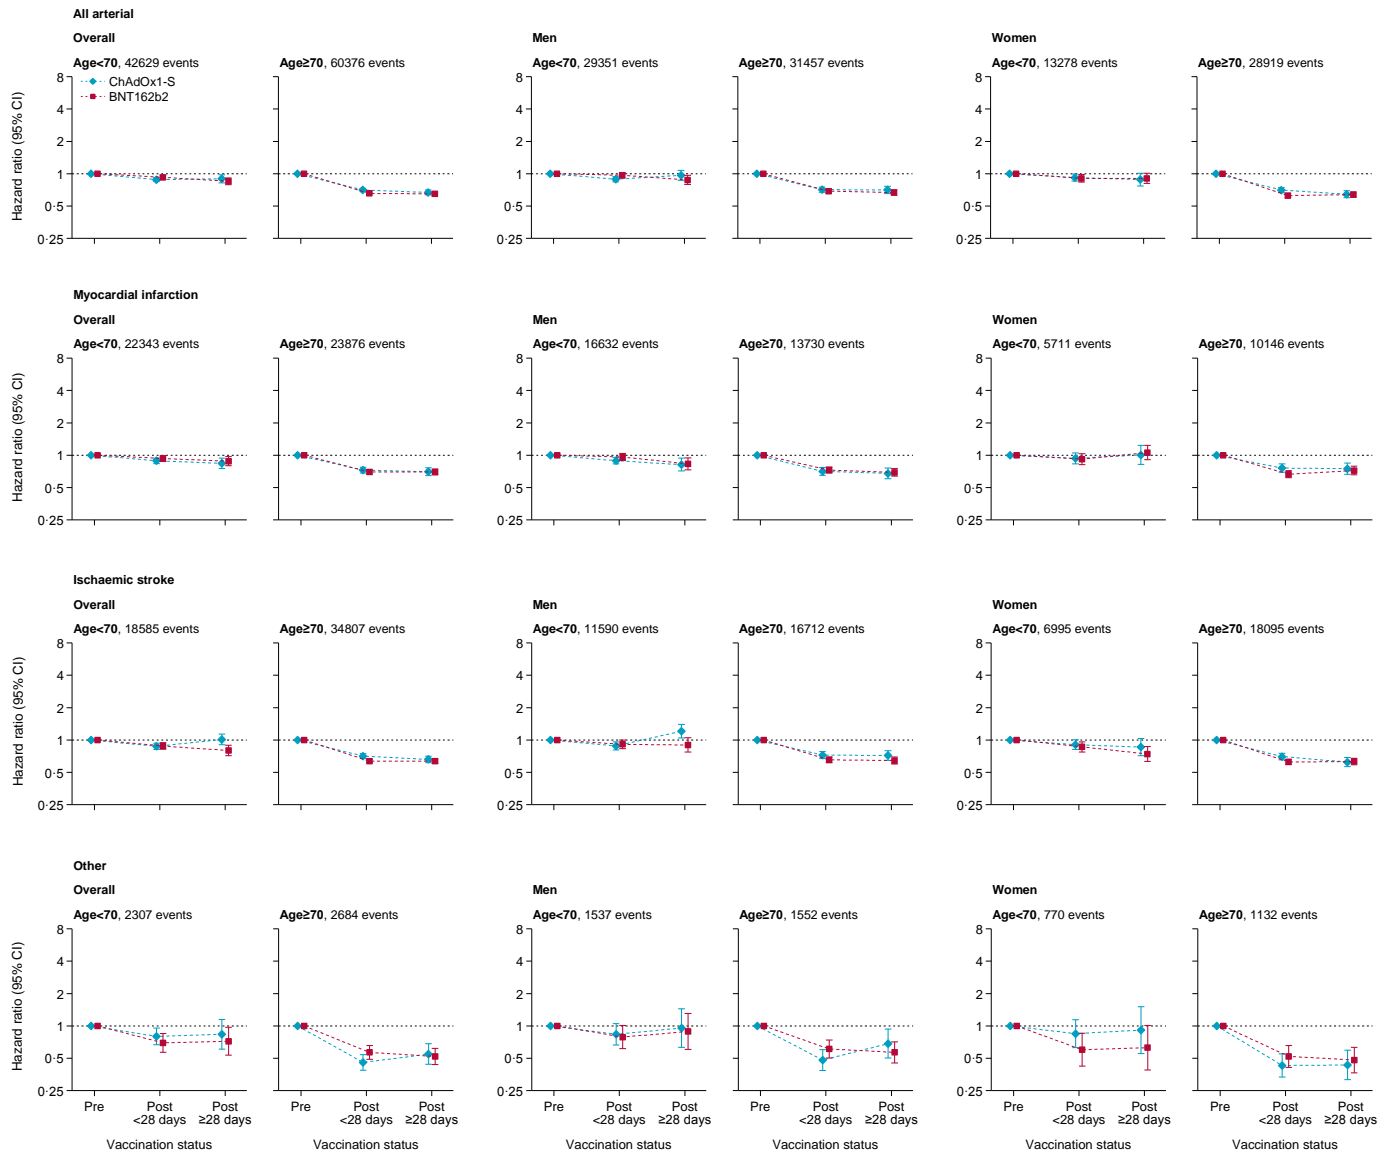

### C Other

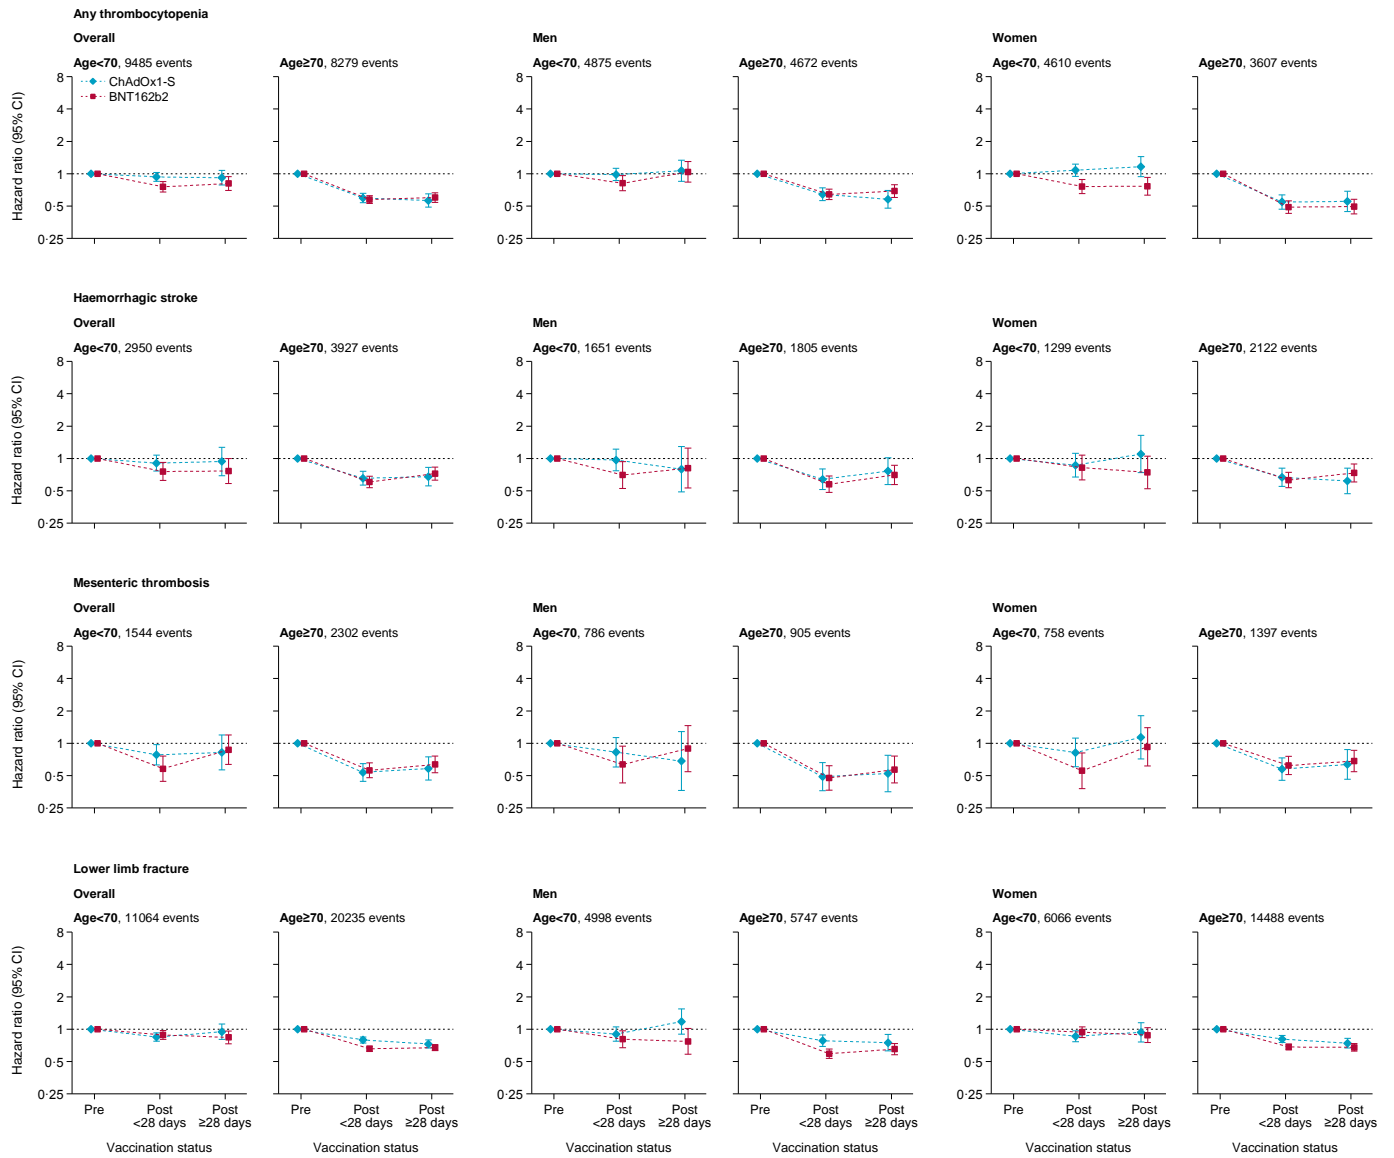

Supplement: pmed.1003926.s008.pdf [file pmed.1003926.s008.pdf]
